1 **Ventral motor thalamic input to prelimbic cortex, but not to striatum, mediates cost-**  
2 **benefit decision-making in rats**

3 Bianca Sieveritz\*<sup>1</sup>, Shannon Hayashi Duke<sup>1</sup>, Jeffery R. Wickens<sup>1</sup> and Gordon W. Arbuthnott<sup>1</sup>

4 <sup>1</sup>Okinawa Institute of Science and Technology Graduate University, 1919-1 Tancha, Onna-  
5 son, Okinawa, 904-0495 Japan

6  
7 **Abstract**

8 Both prelimbic corticostriatal neurons and striatal fast-spiking interneurons contribute to  
9 decisions that require a trade-off between cost and benefit. We investigated whether ventral  
10 motor thalamic input to prelimbic cortex or striatum contributes to cost-benefit decision-  
11 making. Optogenetic inhibition of ventral motor thalamic axon terminals in prelimbic cortex  
12 biased rats towards a high cost-high benefit option and, in anesthetized rats, decreased  
13 neuronal activity in deep layers of prelimbic cortex. Stimulation of ventral motor thalamic  
14 nuclei induced a neuronal response in deep layers of prelimbic cortex and simultaneous  
15 optogenetic inhibition of layer 1 inhibitory interneurons similarly decreased neuronal activity.  
16 Chemogenetic inhibition of striatal-projecting ventral motor thalamic neurons did not affect  
17 cost-benefit decision-making. Our results indicate that ventral motor thalamic input to  
18 prelimbic cortex, but not striatum, mediates cost-benefit decision-making, probably by  
19 regulating prelimbic corticostriatal neuron activity directly as well as indirectly through a  
20 network of cortical inhibitory interneurons.

21

22 **Keywords:** ventral motor thalamus; prelimbic cortex; striatum; cost-benefit decision-making;  
23 approach-avoidance; layer 1 inhibitory interneurons; corticostriatal neurons; optogenetics

24

25

## 26 **Introduction**

27 Prefrontal cortical areas are involved in a variety of decisions that require a trade-off:  
28 Anterior cingulate cortex regulates the willingness to expend physical (Walton et al., 2003) or  
29 mental effort to receive a larger reward (Hosking et al., 2014), orbitofrontal cortex is  
30 necessary in risk- and delay-based decision-making (Mobini et al., 2002), dorsomedial  
31 prefrontal corticostriatal neurons encode approach-avoidance behavior (Loewke et al., 2021),  
32 and prelimbic corticostriatal neurons mediate the trade-off between a more costly, more  
33 beneficial and a less costly, less beneficial option (Friedman et al., 2015). Recent studies  
34 have highlighted the importance of rodent ventral motor thalamic nuclei (ventromedial,  
35 ventral anterior and ventrolateral thalamic nucleus; MT) in tasks that require animals to  
36 choose between two options (Catanese and Jaeger, 2021; Gaidica et al., 2018; Guo et al.,  
37 2017). In rodents, MT sends dense projections to prelimbic cortex (Arbuthnott et al., 1990;  
38 Herkenham, 1979) and some MT neurons send collaterals to striatum (Elena Erro et al., 2002;  
39 Kuramoto et al., 2009), raising the question whether MT input to prelimbic cortex or striatum  
40 is involved in decisions that require a trade-off.

41  
42 A previous study has shown that optogenetic inhibition of prelimbic corticostriatal neurons  
43 biased rats towards a more costly, more beneficial option (Friedman et al., 2015). In contrast,  
44 the same perturbation did not affect choices made between a high and low benefit, or a high  
45 and low cost option (Friedman et al., 2015). We and others previously showed that MT  
46 projections to prelimbic cortex preferentially contact corticostriatal pyramidal neurons  
47 (Arbuthnott et al., 1990; Collins et al., 2018; Sieveritz and Arbuthnott, 2020). Hence, our  
48 first experiment investigated whether MT input to prelimbic cortex is necessary in cost-  
49 benefit decision-making. We demonstrated that optogenetic inhibition of MT axon terminals  
50 in prelimbic cortex biased rats towards a high cost-high benefit option.

51 (Friedman et al., 2015) further showed that optogenetic inhibition of prelimbic corticostriatal  
52 neurons in cost-benefit decision-making also disinhibited striatal fast-spiking interneurons.  
53 Involvement of striatum in cost-benefit decision-making was also confirmed in macaques  
54 (Amemori et al., 2020). Like prelimbic cortex, striatum receives input from MT. Some MT  
55 neurons that project to cortex send collaterals to striatum (Elena Erro et al., 2002; Kuramoto  
56 et al., 2009). We will refer to them as MT striatal-projecting neurons. Striatal-projecting  
57 neurons that originate in MT and other midline/intralaminar thalamic nuclei target striatal  
58 inhibitory interneurons (Johansson and Silberberg, 2020; Klug et al., 2018; Sidibé and Smith,  
59 1999; Smith et al., 2004) and striatal fast-spiking interneurons (Johansson and Silberberg,  
60 2020; Klug et al., 2018; Nakano et al., 2018); the very same striatal interneurons that are  
61 disinhibited by optogenetic inhibition of prelimbic corticostriatal neurons in cost-benefit  
62 decision-making (Friedman et al., 2015). Hence, our second experiment investigated whether  
63 MT striatal-projecting neurons are necessary in cost-benefit decision-making.

64

65 Our third and fourth experiment investigated a potential mechanism to explain how  
66 optogenetic inhibition of MT input to prelimbic cortex might induce the observed bias in  
67 cost-benefit decision-making. MT provides input to prelimbic pyramidal neurons and  
68 prelimbic layer 1 inhibitory interneurons (Collins et al., 2018; Sieveritz and Arbuthnott,  
69 2020). Layer 1 inhibitory interneurons, in turn, inhibit a network of cortical inhibitory  
70 interneurons (Cruikshank et al., 2012), which regulates the activity of deep layer pyramidal  
71 neurons (Jiang et al., 2013; Lee et al., 2015). Given our results we propose that MT input to  
72 both prelimbic pyramidal neurons and prelimbic layer 1 inhibitory interneurons is necessary  
73 to regulate the activity of corticostriatal pyramidal neurons in prelimbic cortex. We further  
74 propose that inhibition of MT input reduces the activity of these corticostriatal pyramidal  
75 neurons and induces the observed behavioral bias.

## 76 **Results**

77 We trained 4- to 7-week-old male Sprague-Dawley rats on a benefit-benefit, cost-cost and  
78 cost-benefit decision-making task. Rats were presented with two retractable levers and each  
79 lever was associated with a specific combination of benefit and cost (Figure 1A). On the  
80 benefit-benefit decision-making task one lever was associated with a high benefit paired with  
81 a low cost, and the other lever was associated with a low benefit paired with a low cost. On  
82 the cost-cost decision-making task one lever was associated with a high cost paired with a  
83 high benefit, while the other lever was associated with a low cost paired with a high benefit.  
84 On the cost-benefit decision-making task one lever was associated with a high cost paired  
85 with a high benefit, while the other lever was associated with a low cost paired with a low  
86 benefit. The high benefit in all tasks was 0.1 mL of sweetened condensed milk diluted at 20%  
87 and the low benefit was 0.1 mL of sweetened condensed milk that had been further diluted  
88 than the high reward (1-19%) or tap water. The high cost was a bright light presented at 1.75  
89 kLx for 10 secs, and the low cost was a dim light presented at 1.0 lx for 10 secs. The first  
90 three days of behavioral training on the cost-benefit decision-making task were used to adjust  
91 the dilution of the sweetened condensed milk delivered as the low benefit, so that rats would  
92 choose both the high cost-high benefit and the low cost-low benefit option in about 50% of  
93 the trials.

94

### 95 *Optogenetic inhibition of MT input to prelimbic cortex biased rats towards a high cost-high* 96 *benefit option*

97 At 9 weeks of age, twenty-two rats that had learned all three decision-making tasks received  
98 unilateral virus injections into MT. We injected 50-70 nl of either an adeno-associated virus  
99 expressing archaerhodopsin (AAV5-CAG-ArchT-GFP, n=10; ArchT rats) or a control virus  
100 (AAV5-CAG-GFP, n=12; controls). In addition, we implanted a short optical fiber attached

101 to a 590 nm light emitting diode (LED fiber optic) through the contralateral hemisphere into  
102 ipsilateral prelimbic cortical layer 1 (Figure 1B). We confirmed that virus injections were  
103 primarily confined to MT (Figure 1C). Tips of LED fiber optics were located in prelimbic  
104 cortical layer 1 in close proximity to virus-expressing MT axon terminals (Figure 1C).

105

106 After a 12- to 16-day-long recovery period, we assessed rats' choice behavior. For each of the  
107 three decision-making tasks, rats were presented with 40 trials per day on 3 consecutive days.  
108 We compared rats' choice behavior without (light OFF) and with delivery of the 590 nm light  
109 (light ON). In ArchT rats, delivery of the 590 nm light induced optogenetic inhibition of  
110 virus-expressing MT axon terminals in prelimbic cortical layer 1. On each day, the first 20  
111 trials were light OFF trials, while the last 20 trials were light ON trials. Optogenetic  
112 inhibition of MT axon terminals in prelimbic cortical layer 1 on the cost-benefit decision-  
113 making task biased rats towards the high cost-high benefit option (Figure 1D). In contrast,  
114 choice behavior on the benefit-benefit and cost-cost decision-making tasks was not affected  
115 (Figure 1E and 1F). To compare the percentage of high cost-high benefit choices on the cost-  
116 benefit decision-making task, we performed a mixed-design ANOVA with the injected virus  
117 as between animal factor and light ON/OFF as within animal factor. We observed a  
118 significant interaction effect between the injected virus and light ON/OFF ( $p=0.031$ , Cohen's  
119  $F=0.517$ ,  $df=1$ ). and a main effect for light ON/OFF ( $p=0.005$ , Cohen's  $F=0.707$ ,  $df=1$ ). We  
120 performed post-hoc testing using multiple t-tests and applied a Bonferroni correction to  
121 account for multiple comparisons (adjusted significance level= $0.0028$ ). In light ON trials, we  
122 observed a significant increase in the percentage of high cost-high benefit choices for ArchT  
123 rats ( $p=0.00004$ ,  $r=0.926$ ,  $df=9$ ), but not for controls ( $p=0.552$ ,  $r=0.182$ ,  $df=11$ ). This  
124 indicates that optogenetic inhibition of MT axon terminals in prelimbic layer 1 biased rats'  
125 choices towards the high cost-high benefit option (Figure 1D). To determine whether the

126 increase in the percentage of high cost-high benefit choices from light OFF to light ON trials  
127 differed significantly between controls and ArchT rats, we used an uncorrected Student's t-  
128 test. The increase was significantly larger for ArchT rats than for controls ( $p=0.026$ ,  $r=0.536$ ,  
129  $df=20$ ), further confirming that optogenetic inhibition of MT input to prelimbic cortex biased  
130 choices towards the high cost-high benefit option.

131  
132 Although not significant, we observed a similar trend when data was split by day (Figure 1 -  
133 figure supplement 1). Given that only 20 light ON and OFF trials were administered on each  
134 individual day of behavioral testing, it is not surprising that none of the effects reached  
135 significance on any individual day. However, we did observe an increase in high-cost high-  
136 benefit choices in ArchT rats in light ON trials on the second day of behavioral testing that  
137 approached significance ( $p=0.0037$ ,  $r=0.791$ ,  $df=9$ ; adjusted significance level=0.0028).

138

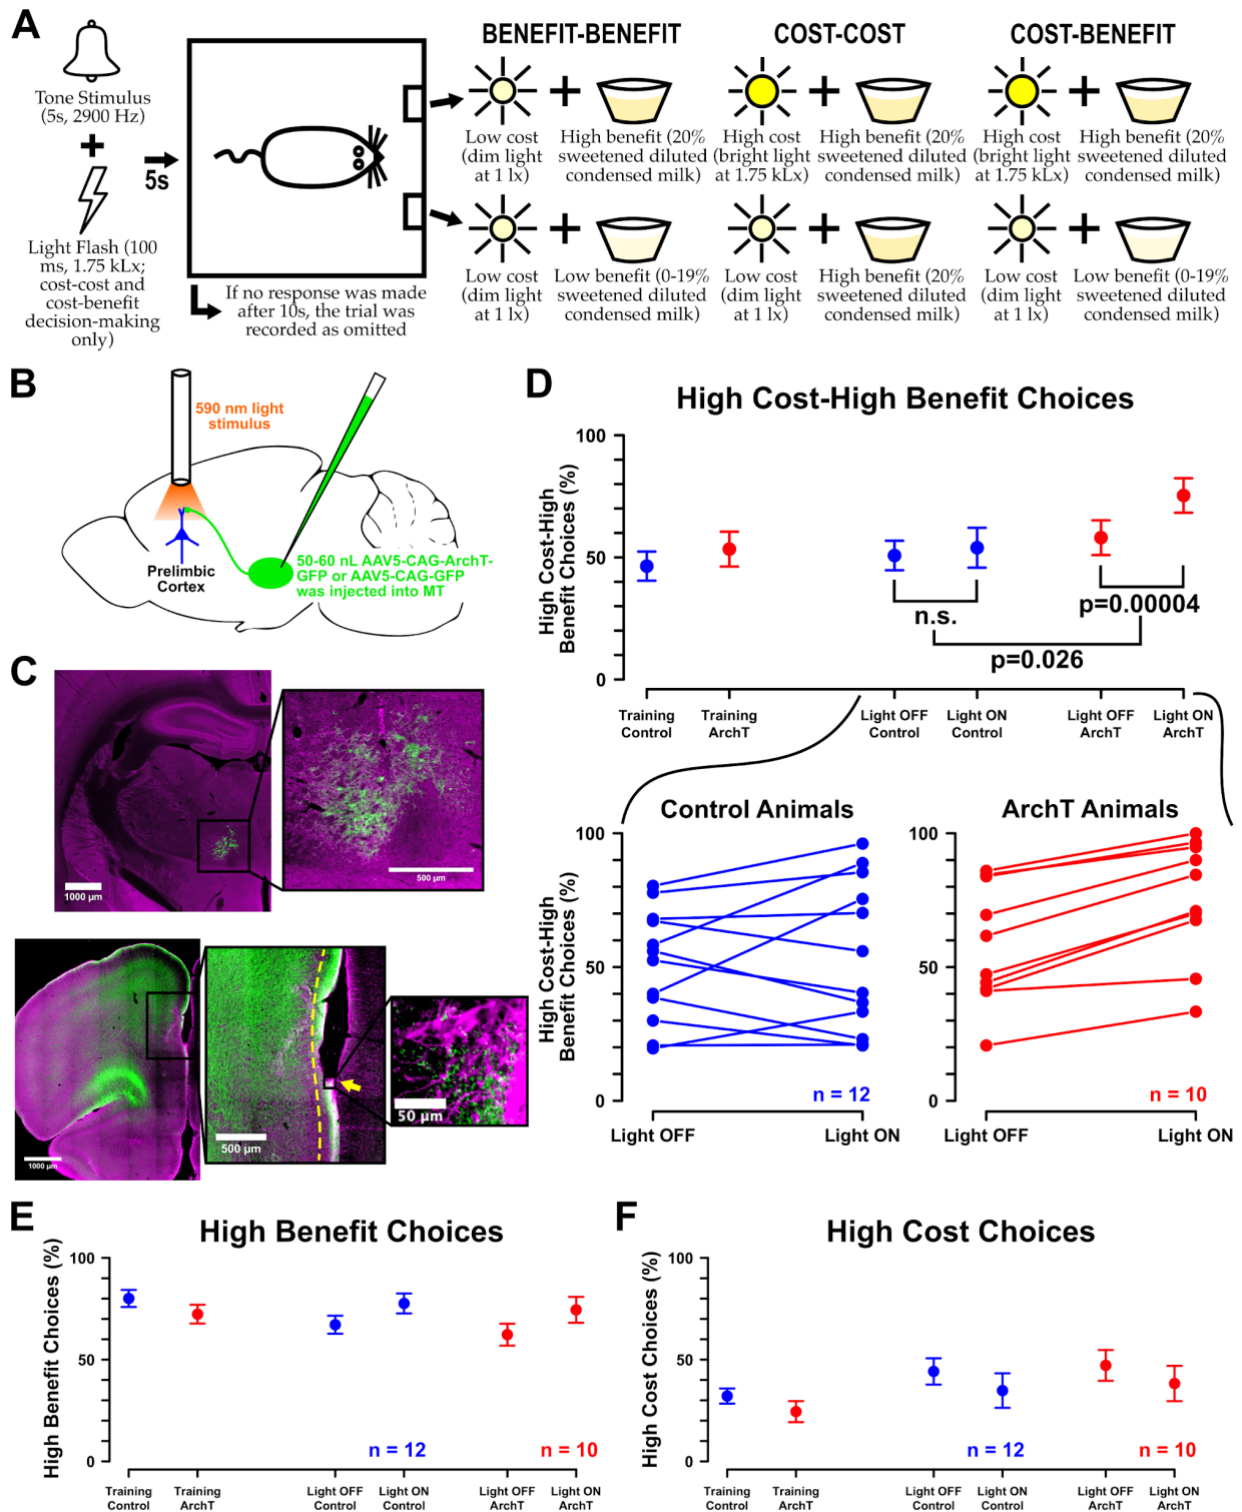

139

140 Figure 1. Optogenetic inhibition of MT axon terminals in prelimbic cortical layer 1 biases

141 rats towards a high cost-high benefit option A- Illustration of the sequence of events on each

142 trial. B- 50-70 nL of either AAV5-CAG-ArchT-GFP or the control virus AAV5-CAG-GFP

143 were injected unilateral into MT and an LED fiber optic was implanted into ipsilateral

144 prelimbic cortical layer 1. C- Upper illustration: Virus expression (green) was confined to  
145 MT, which was counterstained with GAD67 (magenta). Lower illustration: Virus-expressing  
146 MT axon terminals (green) and the LED fiber optic tip (yellow arrow) were located in  
147 prelimbic cortical layer 1. The yellow dashed line marks the approximate span of prelimbic  
148 cortical layer 1. Glial fibrillary acid protein, a neuronal marker for gliosis, is marked in  
149 magenta. D- Upper illustration: Mean percentage of high cost-high benefit choices +/- the  
150 standard error of the mean for controls (blue) and ArchT rats (red). For behavioral training,  
151 the mean across the first 20 trials on the last day of training is shown. For behavioral testing,  
152 data are separated between light ON and OFF trials. Lower illustration: Mean percentage of  
153 high cost-high benefit choices in light ON and OFF trials for each individual control (blue)  
154 and ArchT rat (red). E- Mean percentage of high benefit and F- high cost choices +/- the  
155 standard error of the mean for controls (blue) and ArchT rats (red).  
156



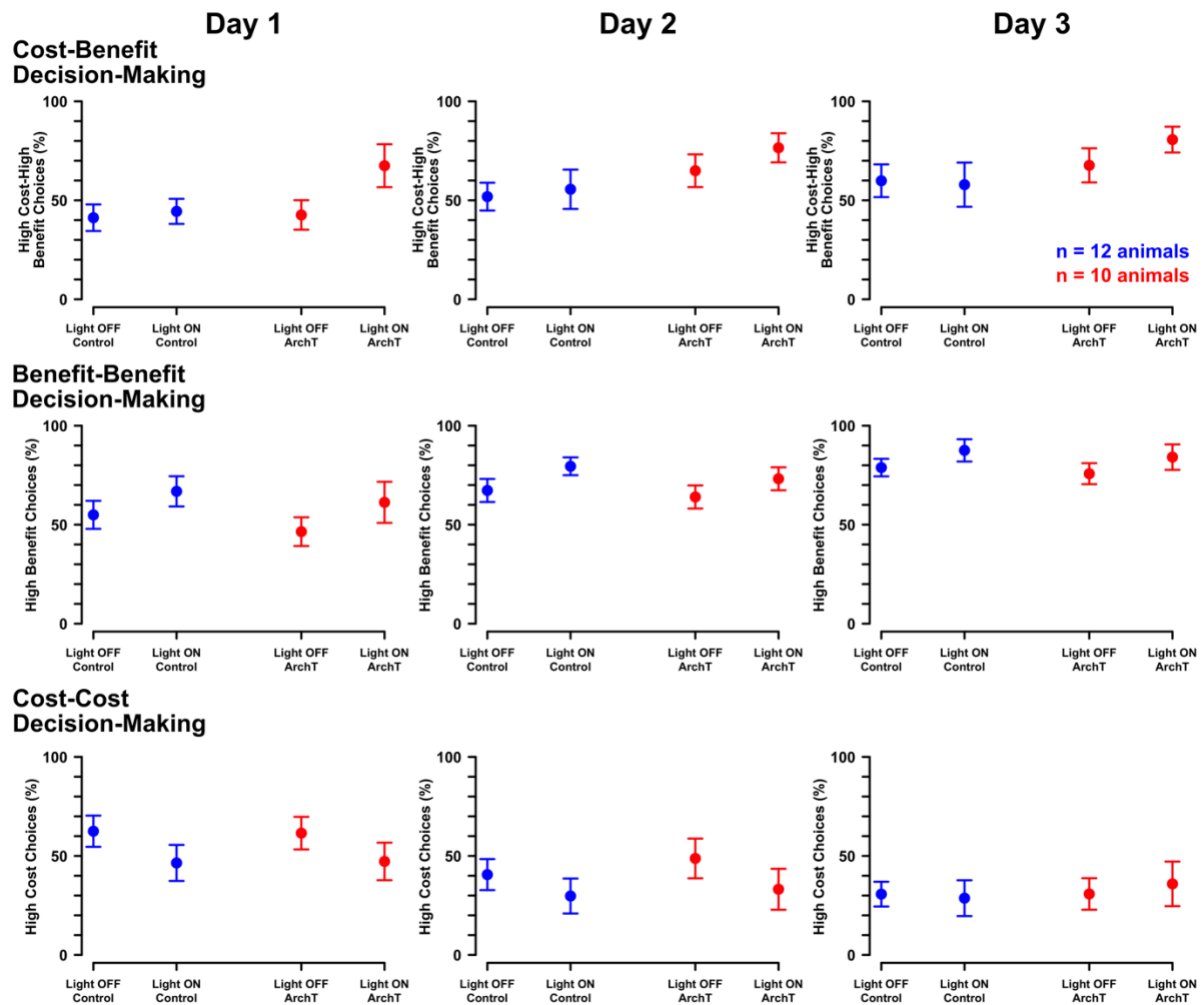

157

158 Figure 1 – figure supplemental 1. Data split by individual behavioral testing days showed

159 similar trends to data averaged across all behavioral testing days. Mean percentage of high

160 cost-high benefit, high benefit or high cost choices +/- standard error of the mean for controls

161 (blue) and ArchT rats (red) in light ON and OFF trials on each individual day of behavioral

162 testing.

163

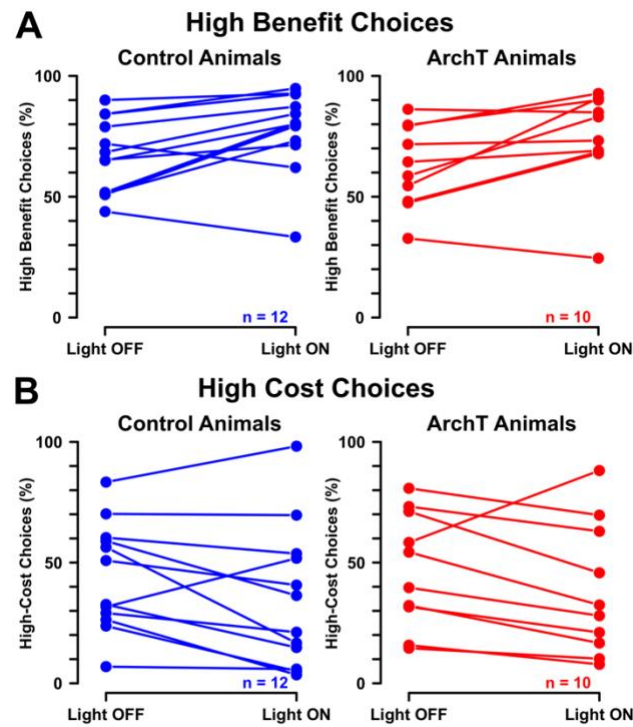

164

165 Figure 1 – figure supplemental 2. Data on the benefit-benefit and cost-cost decision-making

166 task for each individual animal. A- Mean percentage of high benefit and B- high cost choices

167 for each individual controls (blue) and ArchT rat (red) in light ON and OFF trials.

168

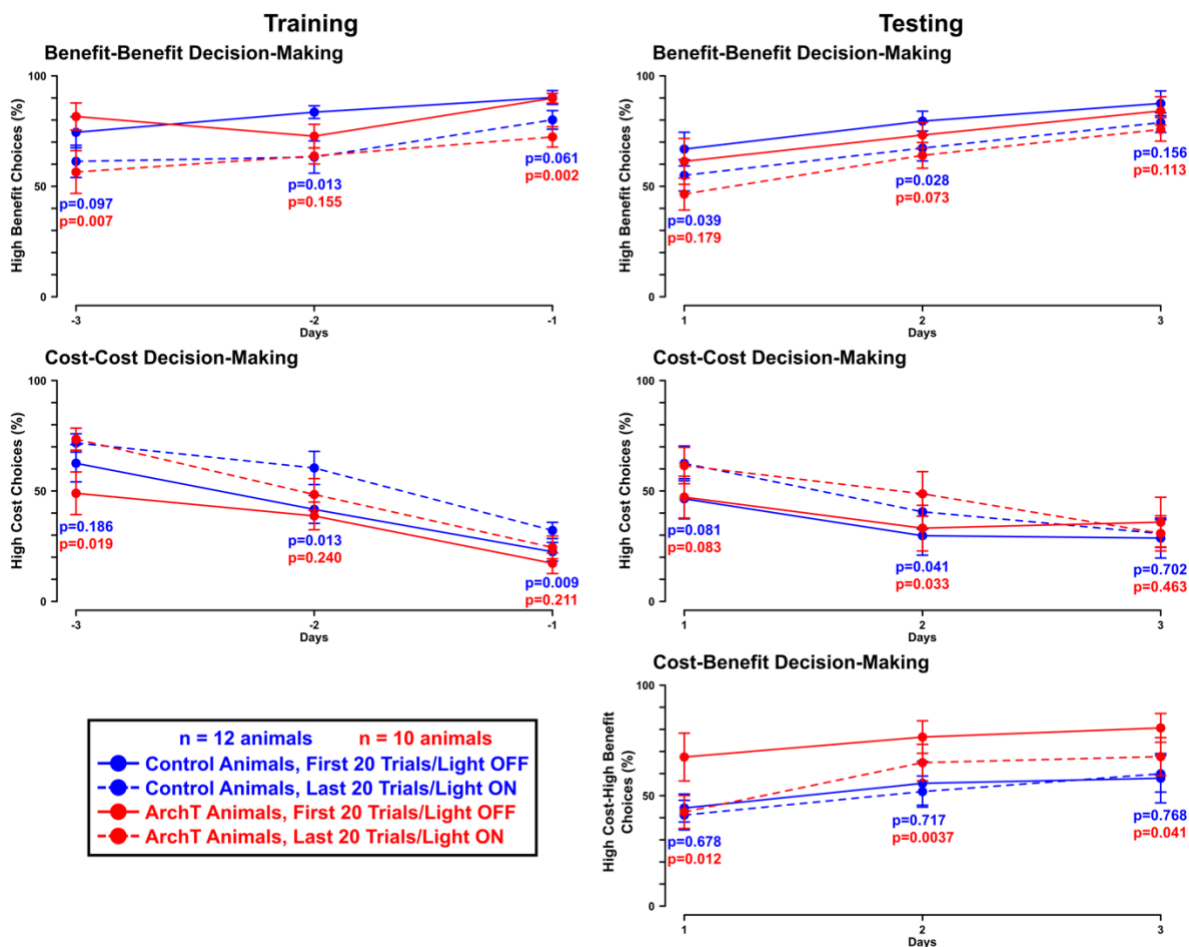

169

170 Figure 1 – figure supplemental 3. Rats show a within session retention effect on the benefit-  
 171 benefit and cost-cost decision-making task. We compared the choice behavior on the first and  
 172 last 20 trials on the last three days of behavioral training and on each day of behavioral  
 173 testing. Plots show the mean percentage of high benefit, high cost or high cost-high benefit  
 174 choices +/- the standard error of the mean for controls (blue) and ArchT rats (red) on the first  
 175 or last 20 trials on each day on the last three days of behavioral training and on each day of  
 176 behavioral testing. For behavioral testing the first 20 trials were light OFF trials, while the  
 177 last 20 trials were light ON trials. Data on the percentage of high cost-high benefit choices is  
 178 not presented for the last three days of behavioral training, since the first three days of  
 179 training were used to titrate the dilution of sweetened condensed milk for each rat. Data that  
 180 includes the first three training days, which is the case for most rats, does not represent the

181 actual choice behavior of rats after titration of the sweetened condensed milk dilution. Effects  
182 sizes are indicated in Appendix 1 – Table 1.

183

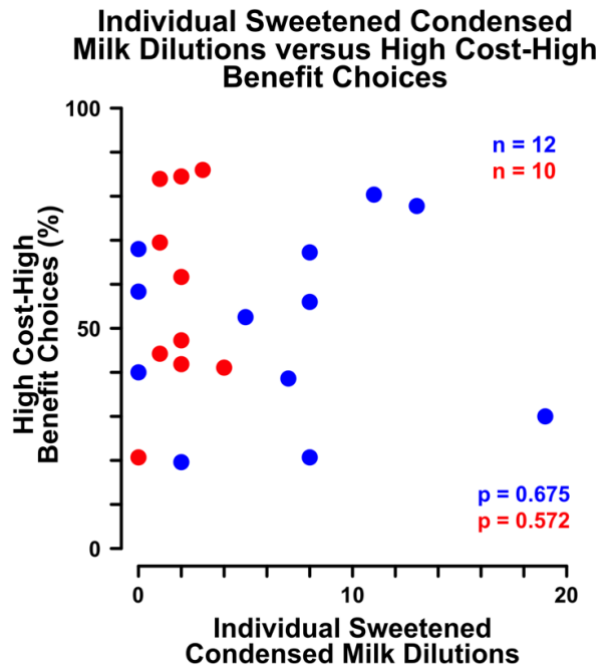

184

185 Figure 1 - figure supplement 4. Correlation between individual dilution of sweetened  
186 condensed milk determined for each rat and high cost-high benefit choices for controls (blue)  
187 and ArchT rats (red).

188

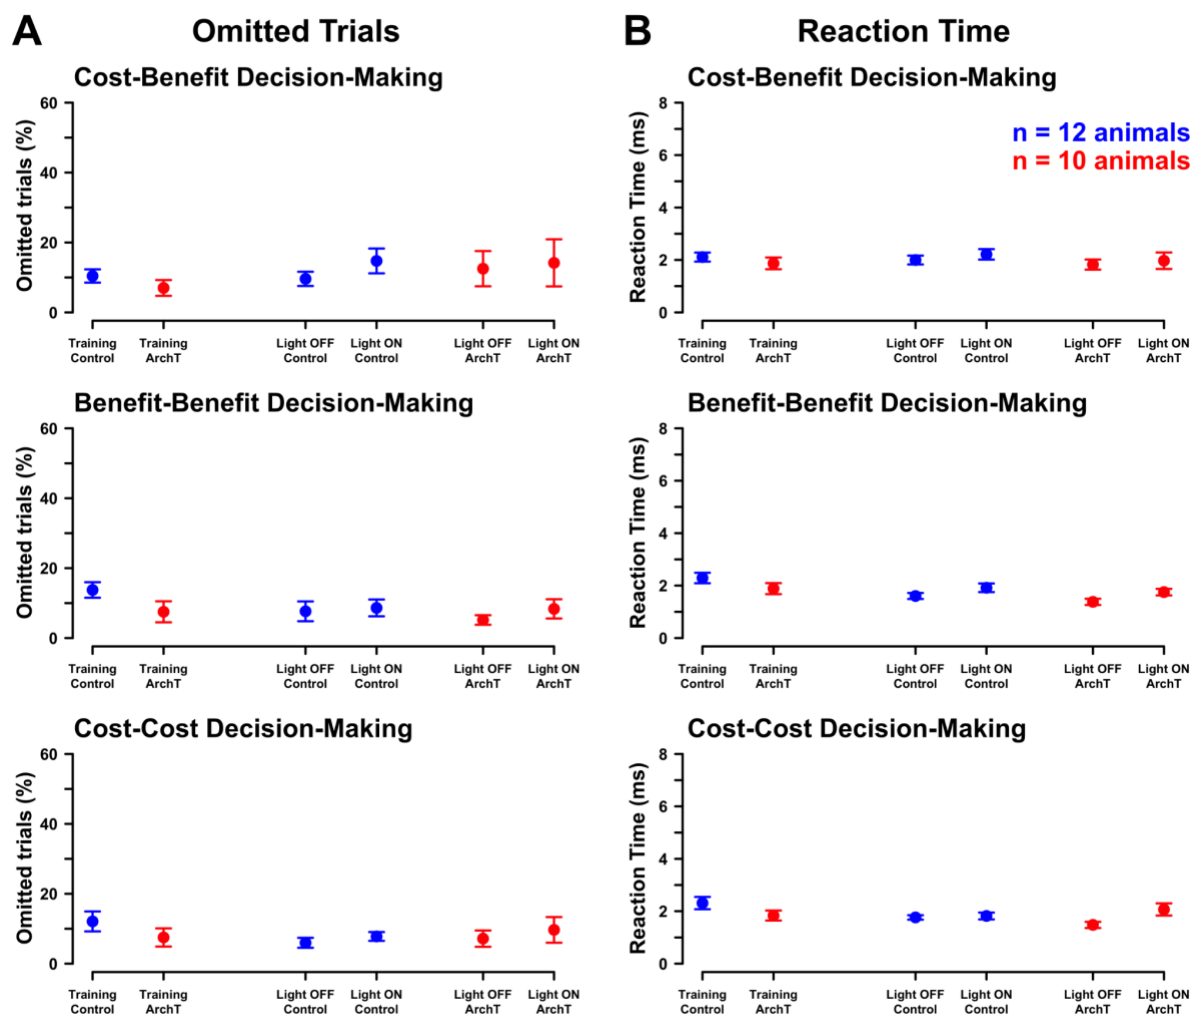

189

190 Figure 1 – figure supplemental 5. Percentage of omitted trials and reaction times on non-  
 191 omitted trials upon optogenetic inhibition of MT axon terminals in prelimbic cortical layer 1.  
 192 Plots show the mean percentage of omitted trials or reaction times on non-omitted trials +/-  
 193 the standard error of the mean on the cost-benefit, benefit-benefit and cost-cost decision-  
 194 making task for controls (blue) and ArchT rats (red) averaged over the first 20 trials on the  
 195 last day of behavioral training, in light ON and OFF trials.

196

197 *No changes in choice behavior were observed on the benefit-benefit and cost-cost decision-*  
 198 *making tasks*

199 We observed a main effect of light ON/OFF in the benefit-benefit ( $p=0.001$ , Cohen's  
 200  $F=0.903$ ,  $df=1$ ) and cost-cost decision-making tasks ( $p=0.014$ , Cohen's  $F=0.605$ ,  $df=1$ ).

201 However, post-hoc testing (Bonferroni correction applied to account for multiple  
202 comparisons; adjusted significance level=0.0028) did not confirm that the percentage of high  
203 benefit choices (ArchT:  $p=0.019$ ,  $r=0.690$ ,  $df=9$ ; controls:  $p=0.016$ ,  $r=0.652$ ,  $df=11$ ; Figure 1E  
204 and Figure 1 - figure supplement 2A) or high cost choices (ArchT:  $p=0.093$ ,  $r=0.531$ ,  $df=9$ ;  
205 controls:  $p=0.076$ ,  $r=0.508$ ,  $df=11$ ; Figure 1F and Figure 1 - figure supplement 2B) had  
206 changed significantly. This indicates that optogenetic inhibition of MT terminals in prelimbic  
207 cortex did not alter choice behavior in either of these two tasks.

208

209 Given that we used a block design and observed an increase in the percentage of high benefit  
210 choices and a decrease in the percentage of high cost choices from the first to the second half  
211 of each behavioral training session (Figure 1 – figure supplement 3), it is likely that the main  
212 effect of light ON/OFF was caused by a within session retention effect. However, the  
213 observed effect might instead have been due to unexpected electrophysiological side effects  
214 caused by exposure of the brain tissue to the 590 nm light, which was delivered to prelimbic  
215 cortical layer 1 in light ON trials. When we plotted the percentage of high benefit or high cost  
216 choices on the first and last 20 trials on the last 3 days of behavioral training (Figure 1 –  
217 figure supplement 3), we observed an increase of high benefit and a decrease of high cost  
218 choices between the first and last 20 trials on each of the last 3 days of behavioral training  
219 (Figure 1 – figure supplement 3). Given that we observed this effect during behavioral  
220 training, which happened prior to implantation of the 590 nm LED fiber optics, a within  
221 session retention effect is a more likely explanation than a side effect of the 590 nm light. In  
222 our experiments, the 590 nm light was delivered at a maximum intensity of 1.2mW and for a  
223 maximum of 20 secs in our experiments. In brain slices, delivery of a 532 nm light stimulus  
224 at 1 mW for up to 30 secs did not change the firing rate of cortical neurons (Stujenske et al.,  
225 2015), making it unlikely that light delivery alone increased or decreased neuronal activity.

226 Moreover, given the numerical aperture and core radius of our optical fibers, a 561 nm light  
227 stimulus delivered at 1.2 mW is reduced to as little as 0.14 mW/mm<sup>2</sup> at a 1 mm distance  
228 from the fiber tip (Deisseroth, 2021), making it even less likely that light delivery caused  
229 unexpected side effects in our experiments.

230

231 *Effects are not explained by pre-existing differences in choice behavior or caused by surgery*

232 We confirmed that none of the behavioral effects, or the absence thereof, were explained by  
233 pre-existing differences in choice behavior. Choice behavior of controls and ArchT rats was  
234 comparable before and in light OFF trials after the surgery ( $p > 0.0028$ ; Figure 1D, 1E and 1F;  
235 for detailed p-values and effect sizes see Appendix 1 - Table 2). We further confirmed that  
236 behavioral effects or the absence thereof were not caused by surgery. No significant changes  
237 in choice behavior were observed pre- as compared to post-surgery for either controls or  
238 ArchT rats ( $p > 0.0028$ ; Figure 1D, 1E and 1F; for detailed p-values and effects sizes see  
239 Appendix 1 - Table 2). Lastly, we confirmed that reward sensitivity in light OFF trials as  
240 indicated by individually determined sweetened condensed milk dilutions did not correlate  
241 with the percentage of high cost-high benefit choices (Figure 1 - figure supplemental 4;  
242 ArchT: Kendall's Tau=0.149,  $p=0.572$ ,  $df=9$ ; controls: Kendall's Tau=0.095,  $p=0.675$ ,  
243  $df=11$ ).

244

245 *Optogenetic inhibition of MT axon terminals in prelimbic cortex did not disrupt motor*  
246 *function*

247 Given that we inhibited axon terminals emerging from MT, a brain region known to be  
248 heavily involved in motor control, we might have interfered with the rats' motor function. To  
249 confirm that motor function was not disrupted, we compared the percentage of omitted trials  
250 as well as the average reaction time on non-omitted trials between light ON and OFF trials

251 within ArchT rats and within controls (Figure 1 – figure supplement 5). Comparing the  
252 percentage of omitted trials, we observed a main effect for light ON/OFF on the cost-benefit  
253 decision-making task ( $p=0.035$ , Cohen's  $F=0.506$ ,  $df=1$ ). Comparing the average reaction  
254 time, we observed an interaction effect ( $p=0.025$ , Cohen's  $F=0.542$ ,  $df=1$ ) and a main effect  
255 for light ON/OFF on the cost-cost ( $p=0.013$ , Cohen's  $F=0.607$ ,  $df=1$ ) as well as a main effect  
256 for light ON/OFF on the benefit-benefit decision-making task ( $p=0.001$ , Cohen's  $F=0.855$ ,  
257  $df=1$ ). However, post-hoc testing with an applied Bonferroni correction for multiple  
258 comparisons (adjusted significance level= $0.0083$ ) did not confirm any of these effects  
259 ( $p>0.0083$ , for detailed p-values and effect sizes see Appendix 1 - Table 2). Hence, we  
260 concluded that our rats' motor function was not disrupted. Rats were able to move towards  
261 the lever and to move at comparable speeds in light ON and OFF trials.

262

263 *Chemogenetic inhibition of MT striatal-projecting neurons did not induce a bias on the cost-*  
264 *benefit decision-making task*

265 Midline and intralaminar thalamic nuclei provide input to striatal fast-spiking interneurons  
266 (Johansson and Silberberg, 2020; Klug et al., 2018; Nakano et al., 2018); the same neurons  
267 that show altered activity in cost-benefit decision-making during optogenetic stimulation or  
268 inhibition of prelimbic corticostriatal neurons (Friedman et al., 2015). Hence, we explored  
269 whether chemogenetic inhibition of MT striatal-projecting neurons also induces a bias in  
270 choice behavior on the cost-benefit decision-making task. However, we first verified that MT  
271 thalamostriatal projection neurons project to striatal fast-spiking interneurons in striatum.  
272 Given that midline and intralaminar thalamostriatal projection neurons also provide input to  
273 plateau-depolarization low-threshold spike neurons (PLTS neurons; Sidibé and Smith, 1999;  
274 Smith et al., 2004) and cholinergic interneurons (Johansson and Silberberg, 2020; Klug et al.,



275 2018; Lapper and Bolam, 1992), we further tested whether MT striatal-projecting neurons  
276 also project to these two types of neurons.

277

278 To definitively label MT striatal-projecting neurons, we used a method called retro-  
279 DREADDs (Augur et al., 2016), which allowed us to express an adeno-associated virus  
280 tagged with hM4Di and a fluorochrome in specific projection neurons. First, we injected 50-  
281 60 nL of either a Cre-dependent virus tagged with hM4Di and mCherry (AAV5-hSyn-DIO-  
282 hM4D(Gi)-mCherry, n=13) or a control virus without the hM4Di tag (AAV5-hSyn-DIO-  
283 mCherry, n=11) into MT. In the same surgery, we injected 300 nL of a retrograde, Cre-  
284 expressing adeno-associated virus into striatum (AAVrg-pmSyn1-EBFP-Cre; Figure 2A).  
285 The approach resulted in specific labeling of MT striatal-projecting neurons (Figure 2B).  
286 Labeled terminals of these MT neurons in striatum were found in close proximity to fast-  
287 spiking interneurons stained for parvalbumin (Tepper et al., 2018) (PV), PLTS neurons  
288 stained for brain nitric oxide synthase (Tepper et al., 2018) (bNOS) and cholinergic  
289 interneurons stained for choline acetyltransferase (Tepper et al., 2018) (CHAT; Figure 2C).  
290 Thus, it is likely that MT striatal-projecting neurons provide input to fast-spiking  
291 interneurons, PLTS neurons and cholinergic interneurons in striatum.

292

293 The injected animals, a total of twenty-four male Sprague-Dawley rats, had all successfully  
294 learned the three decision-making tasks described above. We tested whether chemogenetic  
295 inhibition of MT striatal-projecting neurons biased rats on any of the three decision-making  
296 tasks. We compared the choice behavior of rats that had been injected with the hM4Di-tagged  
297 virus and expressed hM4Di in MT striatal-projecting neurons (hM4Di rats) with the choice  
298 behavior of controls. We compared the choice behavior after an intraperitoneal injection of  
299 either D21 agonist or saline. In hM4Di rats, the D21 agonist activates the hM4Di receptors

300 expressed in MT striatal-projecting neurons, which chemogenetically inhibits the neurons. In  
301 controls, the D21 agonist does not affect neuronal activity.

302

303 For each decision-making task rats were presented with 60 trials per day on two consecutive  
304 days. Saline was injected on one of the days and D21 agonist on the other day. To our  
305 surprise, inhibition of MT striatal-projecting neurons upon injection of the D21 agonist did  
306 not induce behavioral changes in either group of rats (Figure 2D, 2E and 2F). The absence of  
307 effects cannot be explained by pre-existing differences in choice behavior between controls  
308 and hM4Di rats (Figure 2D, 2E and 2F). Furthermore, the absence of effects was not caused  
309 by surgery. The choice behavior within each group of rats was comparable pre- and post-  
310 surgery (Figure 2D, 2E and 2F).

311

312 Chemogenetic inhibition did not disrupt motor function. We compared the percentage of  
313 omitted trials as well as the average reaction time on non-omitted trials between between D21  
314 agonist and saline trials within hM4Di rats and within controls. An ANOVA showed no main  
315 or interaction effects ( $p > 0.05$ ). hM4Di rats were able to move towards the lever after D21  
316 agonist injections and moved towards it at a comparable speed (Figure 2 - figure supplement  
317 1).

318

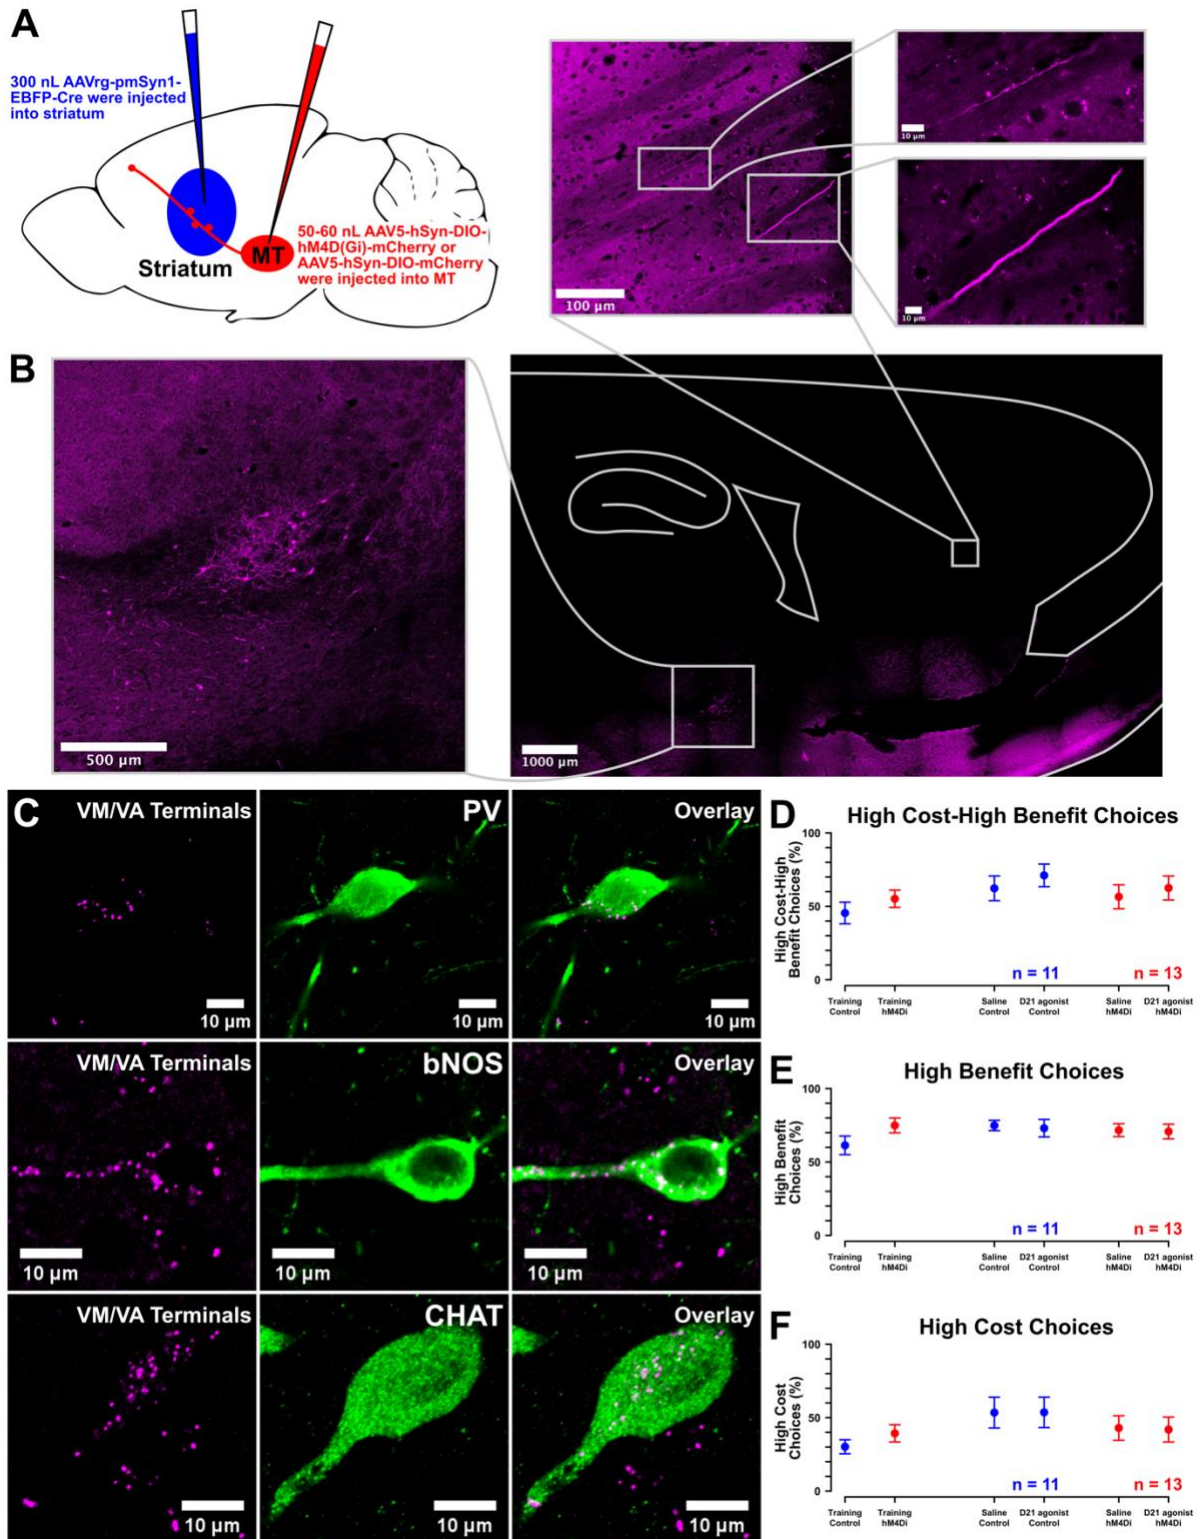

319

320 Figure 2. Chemogenetic inhibition of MT striatal-projecting neurons did not induce a bias on  
 321 the cost-benefit, benefit-benefit or cost-cost decision-making task. A- 50-60 nL of either  
 322 AAV5-hSyn-DIO-hM4D(Gi)-mCherry or the control virus AAV5-hSyn-DIO-mCherry were  
 323 injected into MT. In the same surgery, 300 nL AAVrg-pmSyn1-EBFP-Cre were injected into

324 striatum. B- The left illustration shows that virus expression in neurons as classified by the  
 325 spread of mCherry (magenta) was primarily confined to MT. The illustration on the top  
 326 shows that virus was expressed in MT axons in striatum (magenta). C- MT axons in striatum  
 327 target striatal cell bodies of PV-, bNOS- and CHAT-expressing interneurons. D- Mean  
 328 percentage of high cost-high benefit, high benefit or high cost choices +/- standard error of  
 329 the mean of controls (blue) and hM4Di rats (red) across the first 20 trials on the last day of  
 330 behavioral training, across the 60 trials after saline injection, or across the 60 trials after D21  
 331 agonist injection (0.1 mg/kg).  
 332

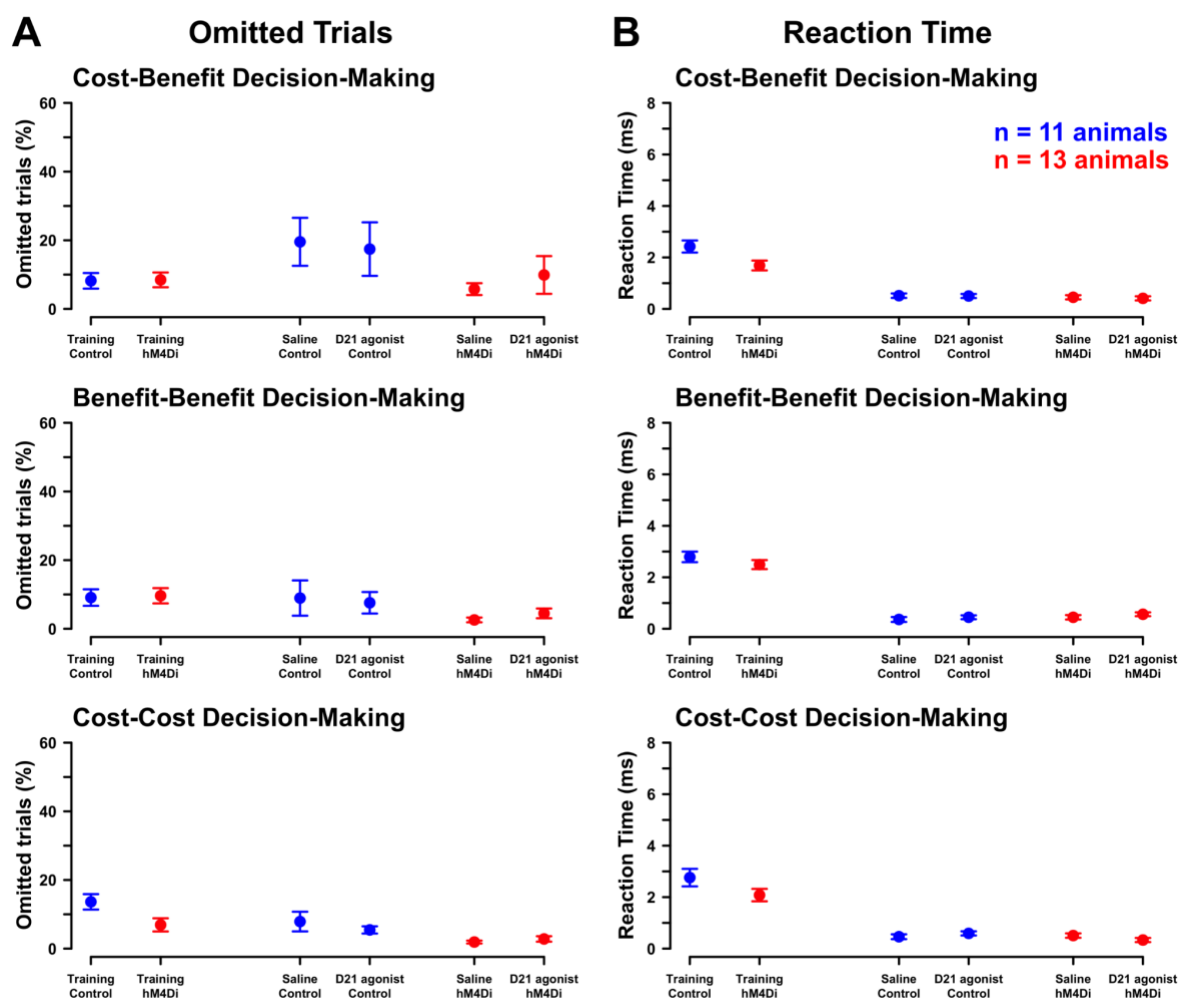

333  
 334 Figure 2 - figure supplemental 1. Percentage of omitted trials and reaction times upon  
 335 chemogenetic inhibition of MT striatal-projecting neurons. Plots show the mean percentage

336 of omitted trials or reaction times on non-omitted trials +/- the standard error of the mean on  
337 the cost-benefit, benefit-benefit and cost-cost decision-making task for controls (blue) and  
338 hM4Di rats (red) averaged over the first 20 trials of the last day of behavioral training, on  
339 saline and on D21 agonist trials.

340

341 *Optogenetic inhibition of MT input to prelimbic cortex decreases the activity of deep layer*  
342 *pyramidal neurons*

343 We explored a possible mechanism that explains how MT input to prelimbic cortex regulates  
344 cost-benefit decision-making. In accordance with our first behavioral experiment, unilateral  
345 injections of 50-70 nl AAV5-CAG-ArchT-GFP were placed in MT in four 9- to 11-week-old  
346 male Sprague-Dawley rats. After a 12- to 16-day-long recovery period, rats were prepared for  
347 *in vivo* recording experiments under isoflurane anesthesia. An optical fiber, which was  
348 coupled to a 590 nm LED, was inserted through the contralateral hemisphere and placed in  
349 ipsilateral prelimbic cortical layer 1. To stimulate MT, a bipolar stimulating electrode was  
350 placed in ipsilateral MT. A glass electrode filled with 3.0M potassium methyl sulfate  
351 (KMeSO<sub>4</sub>) and goat anti-rat Alexa Fluor 594 (dilution between 1:50 to 1:200) was lowered  
352 into deep layers of ipsilateral prelimbic cortex to record extracellular neuronal activity  
353 (Figure 3A). Virus injection sites were comparable to the one presented in Figure 1B. Figure  
354 3B and 3D illustrate the placement of optical fibers, bipolar stimulating electrodes and glass  
355 recording electrodes.

356

357 While we recorded extracellular neuronal activity from neuronal clusters in deep layers of  
358 prelimbic cortex, we stimulated MT nuclei for 0.5 ms at -5 mA to induce a response in the  
359 recorded neuronal clusters (light OFF). Figure 3C shows an example of evoked spikes and of  
360 recorded spontaneous activity. When MT stimulation evoked a response, we simultaneously

361 delivered 590 nm light to prelimbic cortical layer 1 to optogenetically inhibit MT axon  
362 terminals (light ON). Simultaneous optogenetic inhibition of MT input to prelimbic cortex  
363 did not completely silence the activity of neuronal clusters in deep layers of prelimbic cortex.  
364 However, the average number of extracellular spikes per millisecond observed between 2 and  
365 20 ms after MT stimulation significantly decreased from an average of 0.11 spikes per  
366 millisecond without optogenetic inhibition to 0.06 spikes per millisecond under optogenetic  
367 inhibition (paired t-test,  $p=6.6e-8$ ,  $df=38$ , Figure 3E). Our results indicate that MT input to  
368 neurons in deep layers of prelimbic cortex can evoke a response in these neurons.  
369 Optogenetic inhibition of MT input decreases the number of induced extracellular spikes. We  
370 propose that optogenetic inhibition of MT axon terminals in prelimbic layer 1 reduces the  
371 activity of corticostriatal pyramidal neurons in prelimbic cortex and, in turn, causes the  
372 observed behavioral bias towards a high cost-high benefit option.

373

374 Observed spikes are wider after MT stimulation than during segments of spontaneous activity  
375 (Figure 3G and 3H) and are widest when MT stimulation is paired with optogenetic  
376 inhibition of MT axon terminals in prelimbic cortical layer 1 (Figure 3I). Calcium-dependent  
377 spikes in cortex are wider (De La Peña and Geijo-Barrientos, 2000; Pockberger, 1991;  
378 Stafstrom et al., 1985), indicating that MT stimulation might induce calcium-dependent  
379 spikes. In addition, optogenetic inhibition of MT input to layer 1 seems to further increase the  
380 proportion of induced calcium-dependent spikes.

381

382 Although a previous study reported long-term effects upon sustained optogenetic inhibition  
383 of axon terminals such as an increase in spontaneous neurotransmitter release (Mahn et al.,  
384 2016), we did not observe any rebound spiking after optogenetic inhibition of MT axon  
385 terminals for as long as 20 secs. We never inhibited axon terminals for longer than 20 secs,

386 indicating that the results outlined above were not caused by unexpected side effects from  
387 optogenetic inhibition (Figure 3F). Overall, our results are in line with previous studies that  
388 used the same virus (AAV5-CAG-ArchT-GFP) or the same viral construct as serotype 2  
389 (AAV2-CAG-ArchT-GFP) to inhibit axon terminals, which showed robust behavioral effects  
390 (Stefanik et al., 2016; Stefanik and Kalivas, 2013) and partly confirmed that the virus is  
391 suitable for inhibiting axon terminals (Ozawa et al., 2017; Stefanik et al., 2013a, 2013b).

392

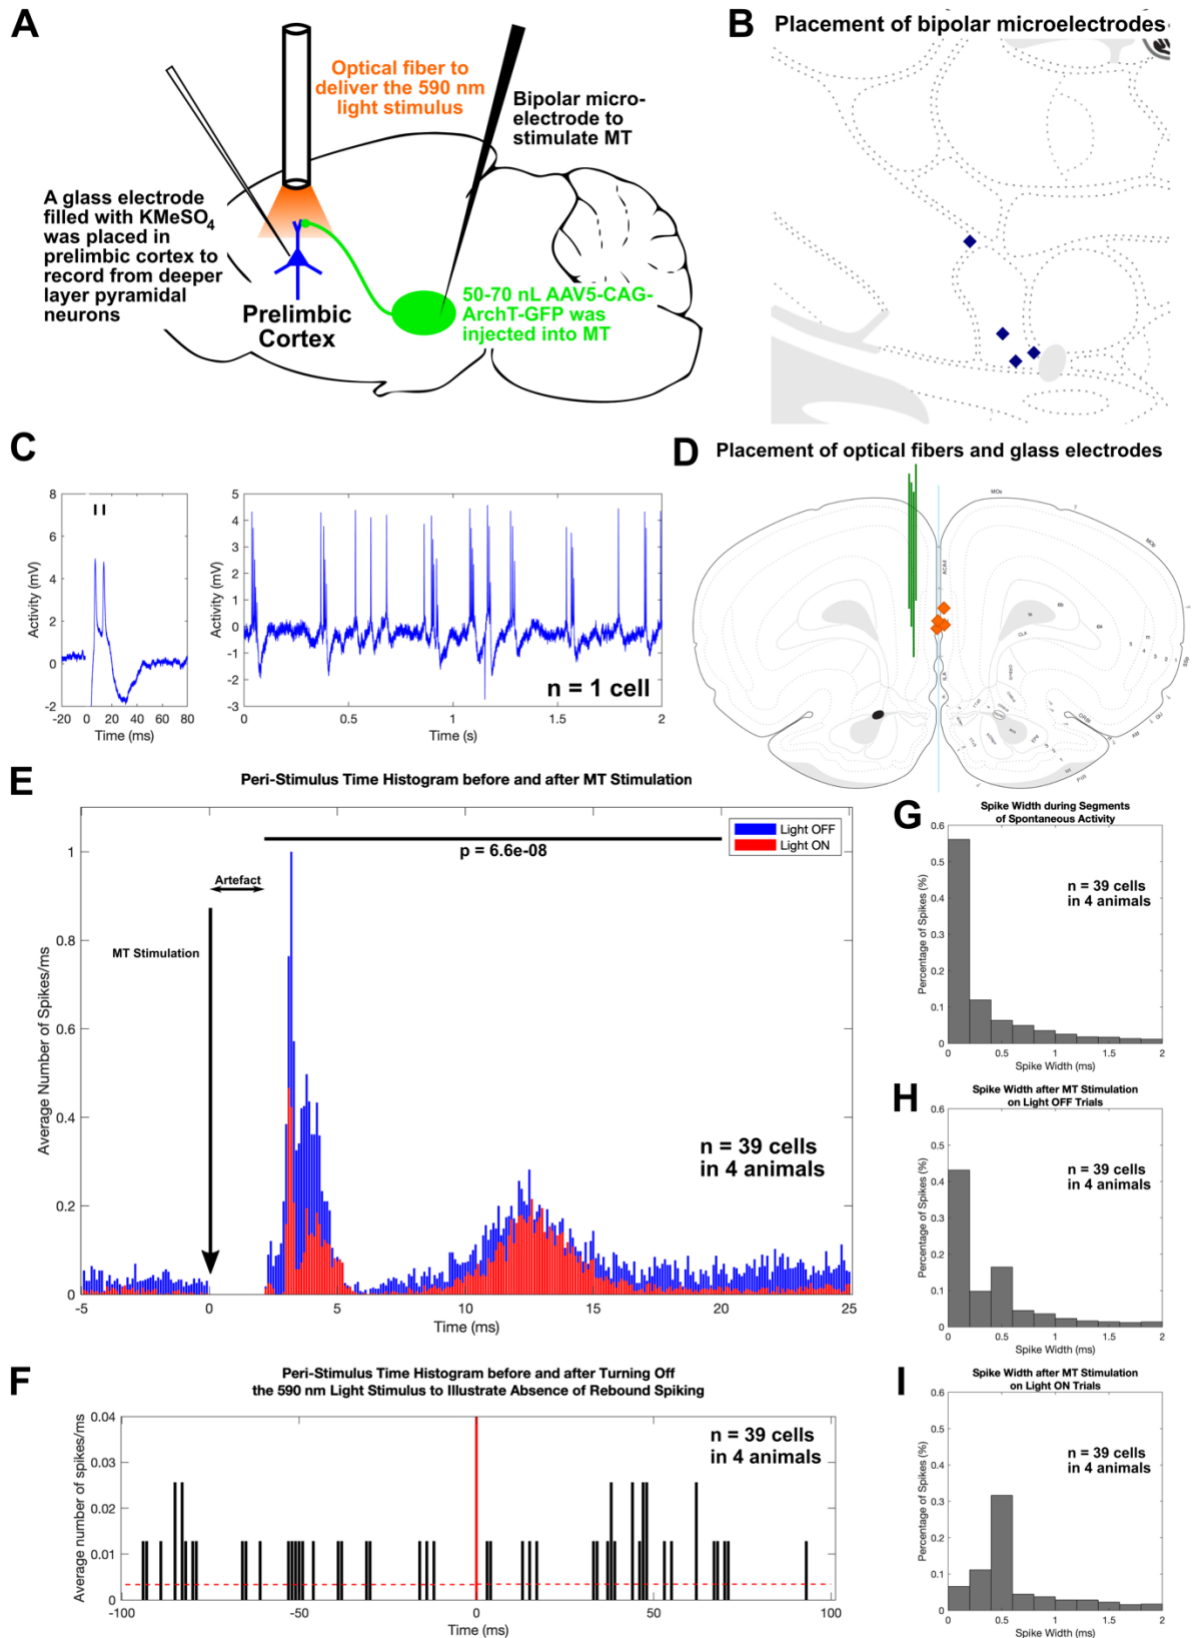

393

394 Figure 3. In anesthetized rats, MT stimulation induced a response in deep layer prelimbic

395 neurons and optogenetic inhibition of MT input to prelimbic cortex reduced the response. A-



396 MT was injected with 50-70 nL AAV5-CAG-ArchT-GFP. A glass electrode was used to  
397 record from neurons in deep layers of prelimbic cortex. MT was stimulated with a bipolar  
398 microelectrode. A 590 nm LED was placed in prelimbic cortical layer 1 to optogenetically  
399 inhibit MT axon terminals. B- Positioning of bipolar stimulating electrodes in MT. C-  
400 Neuronal response evoked by MT stimulation (left) and spontaneous activity recorded from  
401 one neuronal cluster (right). Extracellular spikes are marked by a small black line above the  
402 spike. D- Positioning of optical fiber tips (orange) and glass electrode tracks (green) in  
403 prelimbic cortex. E- Peri-stimulus time histograms show extracellular responses from 5 ms  
404 prior until 25 ms after MT stimulation in light OFF (blue) or ON trials (red). F- A peri-  
405 stimulus time histogram illustrates spontaneous neuronal activity in deep layers of prelimbic  
406 cortex. The vertical red line marks the time the 590 nm light was turned off. The red dotted  
407 lines indicate the mean number of spikes in the 100 ms before and after the light was turned  
408 off. G- Histogram of the width of spikes during segments of spontaneous activity, after MT  
409 stimulation on H- light OFF trials, or I- light ON trials.

410

411 *MT input to prelimbic layer 1 inhibitory interneurons contributes to the regulation of*  
412 *neuronal activity in deep layers of prelimbic cortex*

413 The ventromedial thalamus, one of the nuclei that make up MT, provides input to both  
414 prelimbic pyramidal neurons and prelimbic layer 1 inhibitory interneurons (Sieveritz and  
415 Arbuthnott, 2020). Hence, we were interested in whether prelimbic layer 1 inhibitory  
416 interneurons contribute to MT-mediated regulation of neuronal activity in deep layers of  
417 prelimbic cortex. We previously proposed that MT input regulates the activity of prelimbic  
418 layer 1 inhibitory interneurons. We further proposed that, in turn, layer 1 inhibitory  
419 interneurons regulate a network of cortical inhibitory interneurons, which ultimately regulates  
420 the activity of deep layer pyramidal neurons (Sieveritz and Arbuthnott, 2020).

421 To test our prediction, we stimulated MT and simultaneously inhibited layer 1 inhibitory  
422 interneurons using optogenetics. In three 9- to 10-week-old Sprague-Dawley rats, we placed  
423 small unilateral injections of 10-20 nl AAV5-CAG-ArchT-GFP in prelimbic cortical layer 1.  
424 Given that prelimbic cortical layer 1 only contains inhibitory interneurons (Kubota, 2014)  
425 and no pyramidal neurons, this resulted in specific expression of AAV5-CAG-ArchT-GFP in  
426 prelimbic layer 1 inhibitory interneurons (Figure 4C). We observed no expression of the virus  
427 in pyramidal neurons or any other neurons in deeper layers of prelimbic cortex. Similar to the  
428 previous experiment, an optical fiber that was coupled to a 590 nm LED was inserted through  
429 the contralateral hemisphere and placed in ipsilateral prelimbic cortical layer 1. To stimulate  
430 MT, a bipolar stimulating electrode was placed in ipsilateral MT. A glass electrode filled  
431 with 3.0M potassium methyl sulfate (KMeSO<sub>4</sub>) and goat anti-rat Alexa Fluor 594 (dilution  
432 between 1:50 to 1:200) was lowered into deep layers of ipsilateral prelimbic cortex to record  
433 extracellular neuronal activity (Figure 4A). Figure 4B and 4D illustrate the placement of  
434 optical fibers, bipolar stimulating electrodes and glass recording electrodes.

435

436 As outlined for the previous experiment, we stimulated ipsilateral MT for 0.5 ms at -5 mA to  
437 induce responses in neuronal clusters in deep layers of prelimbic cortex (light OFF trials).  
438 Figure 4E shows an example of evoked spikes and of recorded spontaneous activity. When  
439 MT stimulation evoked a response, we simultaneously delivered 590 nm light to prelimbic  
440 cortical layer 1 to induce optogenetic inhibition in layer 1 inhibitory interneurons (light ON  
441 trials). Optogenetic inhibition of layer 1 inhibitory interneurons resulted in a decrease of  
442 evoked responses (Figure 4F). The average number of extracellular spikes per millisecond  
443 observed between 2 and 20 ms after MT stimulation decreased significantly; independent of  
444 the strength of MT stimulation (paired t-test; for MT stimulation of -5 mA:  $p=1.2e-6$ ,  $df=36$ ;  
445 for -3 mA:  $p=1.2e-5$ ,  $df=36$ ; for -1 mA:  $p=0.8e-2$ ,  $df=36$ ). Overall, our result indicates that

446 prelimbic layer 1 inhibitory interneurons contribute to MT-mediated regulation of deep layer  
447 neurons in prelimbic cortex.

448

449 Evoked spikes had comparable widths in segments of spontaneous activity and after MT  
450 stimulation (Figure 4G and 4H), but were wider when MT stimulation was paired with  
451 optogenetic inhibition of layer 1 inhibitory interneurons (Figure 4I). Given that calcium-  
452 dependent spikes in cortex are wider (De La Peña and Geijo-Barrientos, 2000; Pockberger,  
453 1991; Stafstrom et al., 1985), inhibition of layer 1 inhibitory interneurons seems to increase  
454 the number of MT-induced calcium-dependent spikes. The result further underlines the  
455 importance of layer 1 inhibitory interneurons in processing of MT input to prelimbic cortex.

456

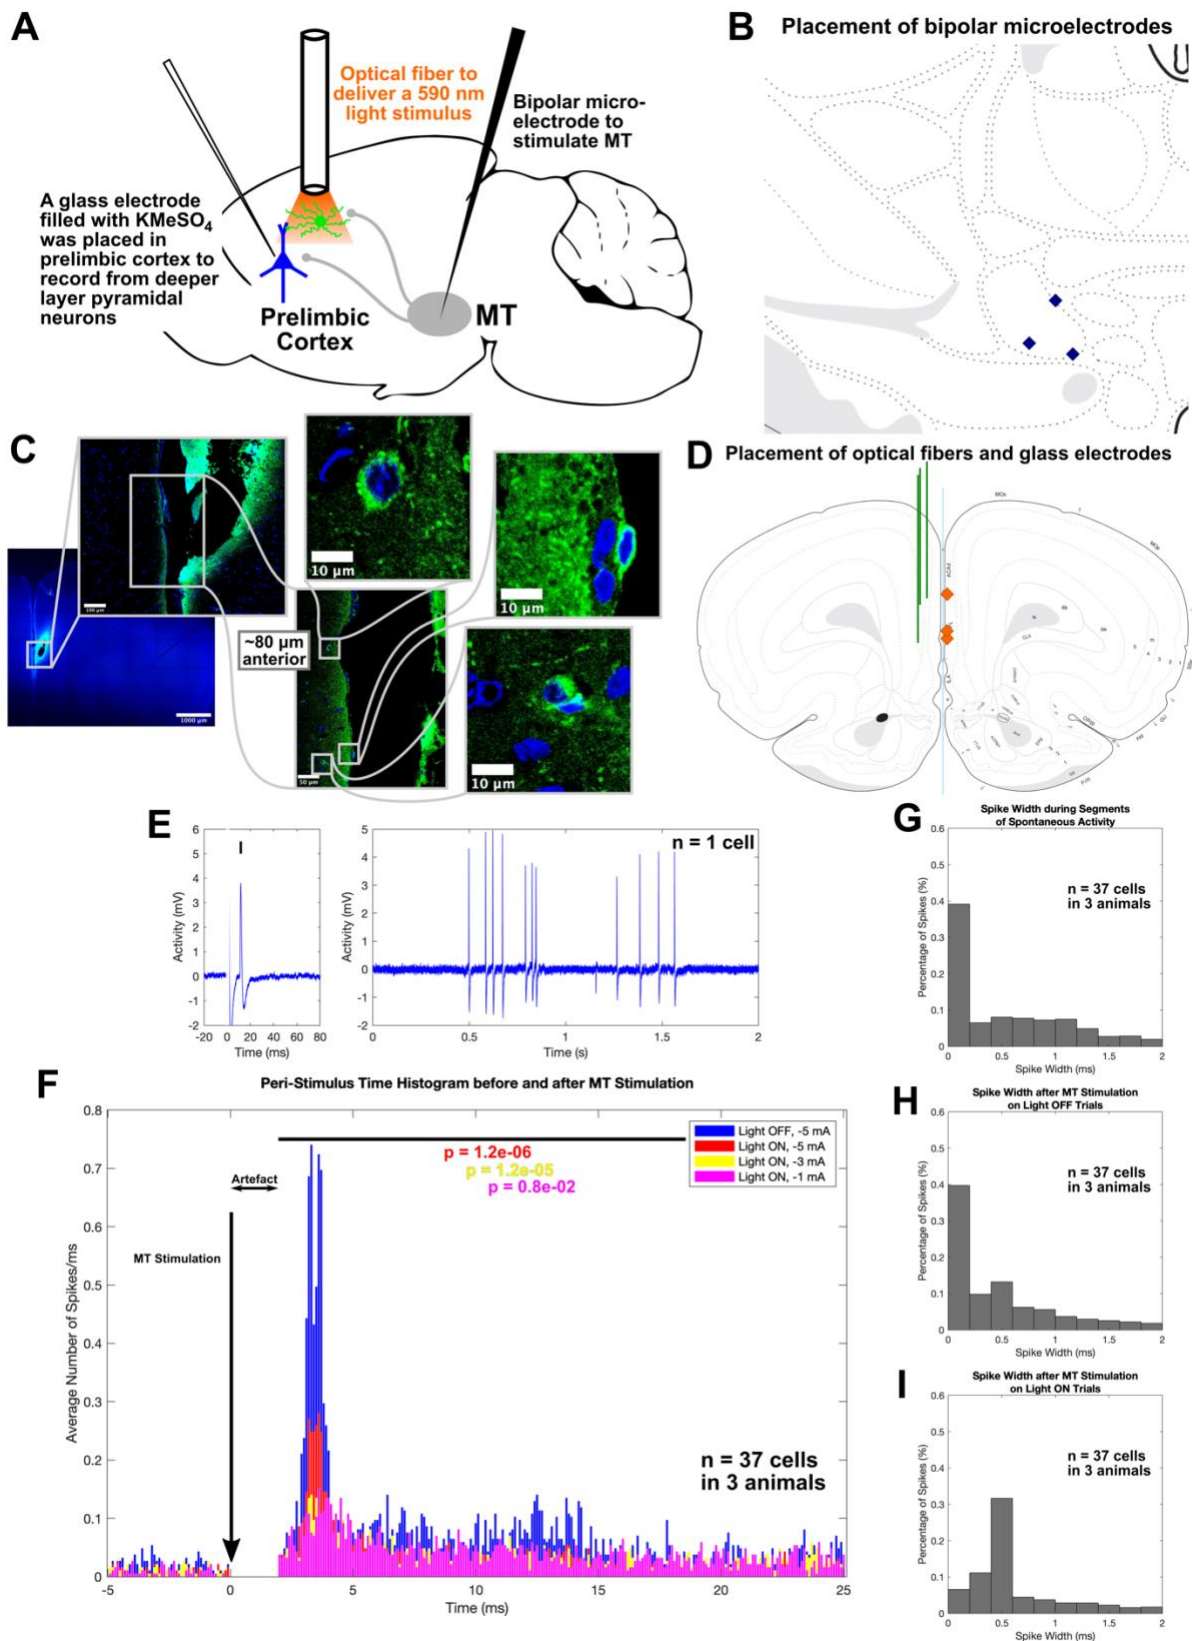

457

458 Figure 4. In anesthetized rats, optogenetic inhibition of layer 1 inhibitory interneurons in

459 prelimbic cortex reduced extracellular responses to MT stimulation. A- Prelimbic cortical

460 layer 1 was injected with 10-20 nL of AAV5-CAG-ArchT-GFP. A glass electrode was used

461 to record from neurons in deep layers of prelimbic cortex. MT was stimulated with a bipolar  
462 microelectrode. A 590 nm LED was placed in prelimbic cortical layer 1 to optogenetically  
463 inhibit layer 1 inhibitory interneurons. B- Positioning of bipolar stimulating electrodes in  
464 MT. C- The optical fiber tip was located in and virus expression was limited to inhibitory  
465 interneurons (green) in prelimbic cortical layer 1. D- Positioning of optical fiber tips (orange)  
466 and glass electrode tracks (green). E- Neuronal response evoked by MT stimulation (left) and  
467 spontaneous activity recorded from the same neuronal cluster (right). Extracellular spikes are  
468 marked by a small black line above the spike. F- Peri-stimulus time histograms show  
469 extracellular responses extracellular responses in light OFF trials from 5 ms prior until 25 ms  
470 after MT stimulation at -5 mA (blue), and in light OFF trials after MT stimulation at -5 mA  
471 (red), -3 mA (yellow) and -1 mA (pink). G- Histogram of the width of spikes during  
472 segments of spontaneous activity, after MT stimulation on H- light OFF trials, or I- light ON  
473 trials.

474

## 475 **Discussion**

476 Optogenetic inhibition of MT axon terminals in prelimbic cortical layer 1 biased rats towards  
477 a high cost-high benefit option, indicating that MT input to prelimbic cortex is necessary for  
478 cost-benefit decision-making. Rats were still able to accurately discriminate high and low  
479 benefit, and high and low cost options, indicating that MT input to prelimbic cortex is not  
480 necessary to process benefit or cost. However, it is crucial for trade-off choices that require  
481 rats to integrate multiple, conflicting reward values. Such integration of reward values might  
482 happen in MT before the outcome of such a computation is transmitted to prelimbic cortex.  
483 Alternatively, MT input to prelimbic cortical layer 1 might modulate inputs from other brain  
484 regions to prelimbic cortex that drive integration of multiple, conflicting reward values. The  
485 latter explanation is supported by findings that MT input to prelimbic cortex is primarily

486 modulatory (Collins et al., 2018). The former explanation highlights a long debate on  
487 whether thalamic nuclei only relay information between specific brain areas, or whether they  
488 perform computations on incoming streams of information and transmit the outcome of these  
489 computations to other brain areas. Research in the sensory domain demonstrated that sensory  
490 thalamic nuclei can integrate two incoming streams of signals (Saalman and Kastner, 2011;  
491 Wolff et al., 2021). More recent research on the central thalamus, a region that borders with  
492 MT, has further shown that thalamic nuclei concerned with motor control might likewise  
493 integrate two streams of incoming signals (Matsuyama and Tanaka, 2021). In our case, MT  
494 might integrate benefit and cost before transmitting the outcome to prelimbic cortex. When  
495 no integration of the two is required, inhibition of MT input to prelimbic cortex does not  
496 affect choice behavior. However, when integration is required, inhibition of MT input to  
497 prelimbic cortex biases rats towards a high cost-high benefit option. Independent of which of  
498 the two explanations is correct, our results demonstrate that MT input to prelimbic cortex is  
499 necessary to integrate multiple, conflicting reward values. We thus extend previous findings  
500 in mice that showed MT activity is correlated with action initiation (Gaidica et al., 2018) and  
501 reciprocal projections between MT and anterior lateral motor cortex play a role in sensory  
502 discrimination (Guo et al., 2017).

503

504 We uncovered a possible mechanism by which MT input to prelimbic cortex might regulate  
505 cost-benefit decision-making. Corticostriatal pyramidal neurons in deep layers of prelimbic  
506 cortex are known to be involved in cost-benefit decision-making (Friedman et al., 2015). We  
507 demonstrated that optogenetic inhibition of MT input to prelimbic cortex as well as inhibition  
508 of prelimbic layer 1 inhibitory interneurons reduced extracellular responses of neurons in  
509 deep layers of prelimbic cortex. We previously reported that about 80% of MT axon  
510 terminals that project onto prelimbic pyramidal neurons, project onto corticostriatal

511 pyramidal neurons (Sieveritz and Arbuthnott, 2020). Given that MT stimulation evoked a  
512 response in the neuronal clusters that we recorded from, it is likely that we recorded from  
513 clusters of corticostriatal pyramidal neurons. Taking this into consideration, we propose a  
514 two-fold mechanism to explain how MT input to prelimbic cortex regulates cost-benefit  
515 decision-making: 1) MT input directly regulates the activity of corticostriatal pyramidal  
516 neurons; and 2) MT input regulates the activity of layer 1 inhibitory interneurons, which  
517 induces feedforward inhibition in a network of cortical inhibitory interneurons. In turn,  
518 corticostriatal pyramidal neurons are disinhibited. When layer 1 inhibitory interneurons are  
519 inhibited, as was the case in our experiment, corticostriatal pyramidal neurons are no longer  
520 disinhibited and their activity is reduced. We further propose that the resulting decrease in  
521 corticostriatal pyramidal activity caused the observed bias towards a high cost-high benefit  
522 option (Figure 5). We believe that such a mechanism is likely, given that direct optogenetic  
523 inhibition of corticostriatal pyramidal neurons similarly induced a bias towards a high cost-  
524 high benefit option (Friedman et al., 2015).

525

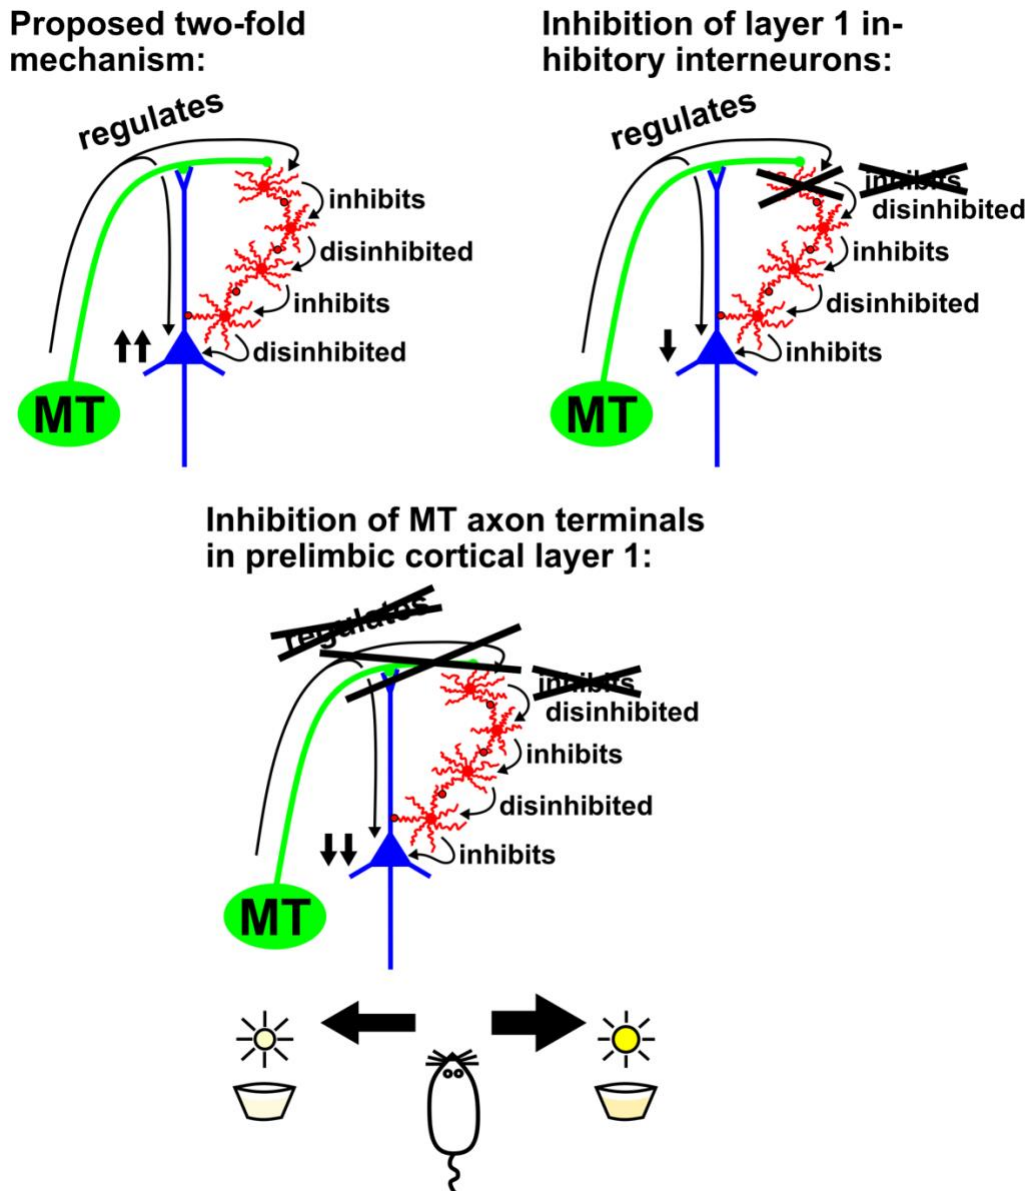

526

527 **Figure 5.** Proposed two-fold mechanism. MT input to prelimbic cortex regulates the activity  
528 of corticostriatal pyramidal neurons directly as well as indirectly via a network of cortical  
529 inhibitory interneurons. When layer 1 inhibitory interneurons are optogenetically inhibited,  
530 corticostriatal pyramidal neurons are no longer disinhibited and their activity is reduced.  
531 When MT axon terminals in prelimbic cortical layer 1 is optogenetically inhibited, the  
532 activity of corticostriatal pyramidal neurons is reduced due to missing MT input as well as  
533 due to them being inhibited by the network of cortical inhibitory interneurons. This causes  
534 the observed behavioral bias towards a high cost-high benefit option.



535 MT input might regulate the activity of corticostriatal pyramidal neurons through  
536 subthreshold excitation. We used high negative currents (-5 mA) that exceed those observed  
537 under physiological conditions, to evoke responses in neuronal clusters in deep layers of  
538 prelimbic cortex. In contrast, a previous study showed that optogenetic stimulation of MT  
539 axon terminals in prelimbic cortex *in-vitro* does not evoke action potentials in deep layer  
540 pyramidal neurons and only subthreshold excitation was observed (Collins et al., 2018).  
541 Therefore, MT might gate inputs from other subcortical sources to corticostriatal pyramidal  
542 neurons in prelimbic cortex by regulating subthreshold excitation of these neurons. A similar  
543 mechanism was observed for the mediodorsal thalamic nucleus, which gates responses in  
544 prefrontal cortical neurons that were evoked by stimulation of the hippocampal output tract  
545 (Floresco and Grace, 2003). Alternatively, MT might regulate the activity of corticostriatal  
546 pyramidal neurons by long-term potentiation or depression, a mechanism that has been  
547 demonstrated for posterior medial thalamic input to barrel cortex (Williams and Holtmaat,  
548 2019).

549

550 In contrast to optogenetic inhibition of MT axon terminals in prelimbic cortical layer 1,  
551 global chemogenetic inhibition of MT striatal-projecting neurons did not alter the choice  
552 behavior of our rats. These results were surprising to us, first, because MT striatal-projecting  
553 neurons target striatal fast-spiking interneurons, which are associated with cost-benefit  
554 decision-making (Friedman et al., 2015). Second, because MT axons projecting to striatum  
555 branch off from MT axons that continue to cortex (Elena Erro et al., 2002; Kuramoto et al.,  
556 2009). One would expect that at least some of the transfected MT striatal-projecting neurons  
557 have axons that continue to prelimbic cortex. One would further expect that chemogenetic  
558 inhibition of these transfected MT neurons would reproduce the results observed with  
559 optogenetic inhibition. There are several possible reasons why this is not the case. First, we

560 might not have transfected enough MT striatal-projecting neurons to induce a behavioral bias.  
561 However, considering the used parameters, when using optogenetic inhibition we were  
562 inhibiting a relatively small number of MT axon terminals in prelimbic cortical layer 1.  
563 Therefore, chemogenetic inhibition of even a small number of transfected MT striatal-  
564 projecting neurons should have induced a behavioral bias. Second, the observed behavioral  
565 bias might have exclusively relied on optogenetic inhibition of axon terminals from those MT  
566 neurons that do not send branches to striatum. Third, global chemogenetic inhibition of MT  
567 striatal-projecting neurons that continue to cortex might reduce activity in both striatum and  
568 cortex. The observed change in choice behavior might thus rely on an imbalance of activity  
569 between cortical versus striatal activity. Global chemogenetic inhibition might reduce activity  
570 in both cortex and striatum, but might not cause an imbalance in activity between the two  
571 brain regions. However, more research will be needed to determine whether this is the case.  
572 Based on our current results, we conclude that MT input to striatum is not involved in cost-  
573 benefit decision-making.

574

575 Aberrant decision-making is a symptom in anxiety (Aupperle and Paulus, 2010), depression  
576 (Amemori and Graybiel, 2012) and chronic stress (Schwabe and Wolf, 2009; Sousa and  
577 Almeida, 2012). Chronic stress biased rats towards high cost-high benefit options (Friedman  
578 et al., 2017), similar to what we observed when we inhibited MT axon terminals in prelimbic  
579 cortical layer 1. Given that optogenetic inhibition of MT input to prelimbic cortex emulates a  
580 behavioral phenotype observed under chronic stress, MT might play a crucial role in  
581 regulating stress. Patients with major depressive disorder exhibited aberrant task-related  
582 prefrontal cortical activity on an approach avoidance task that required integration of benefit  
583 and cost (Ironside et al., 2020). Hence, MT input to prefrontal cortex might also contribute to  
584 depression.

585 Overall, our results suggest that, in addition to MT being involved in diseases related to  
586 motor control such as Parkinson's disease (Brazhnik et al., 2016), MT might also be crucial in  
587 disorders associated with aberrant decision-making. Our results provide evidence that the role  
588 of MT in cognition must be reevaluated. Further studies will be necessary to understand the  
589 contribution of thalamic nuclei to cognition.

590

## 591 **Materials and Methods**

### 592 *1. Animals*

593 53 male Sprague-Dawley rats (Charles River Laboratories, Japan) between 4 and 11 weeks of  
594 age were used. Table 1 provides a detailed overview of the numbers and ages of rats used in  
595 each experiment. Rats were single housed in a climate-controlled vivarium, maintained on a  
596 12h light/dark cycle. Rats used in behavioral experiments were housed on a reversed light  
597 cycle (lights on at 2200h, lights off at 1000h). Rats used in electrophysiological experiments  
598 were either housed on a regular light cycle (lights on at 0700h, lights off at 1900h) or on a  
599 reversed light cycle (lights on at 2200h, lights off at 1000h). Food and water were available  
600 *ad libitum*. Behavioral experiments were conducted within the last 4 hours of the light cycle  
601 or during the dark cycle. Rats were excluded from the study, when virus injections extended  
602 beyond the target brain region or when the tip of optical fibers was located outside of the  
603 target brain area. In addition, rats used in behavioral experiments were excluded from the  
604 study, if they failed to reach the behavioral criteria on any of the three decision-making tasks  
605 as specified below. The required number of animals for behavioral experiments was predicted  
606 a priori based on a similar study conducted in the past (Friedman et al., 2015), but did not  
607 estimate it a priori based on assumptions. The required number of cells for  
608 electrophysiological experiments in anesthetized rats was also predicted based on previous  
609 studies (Brecht and Sakmann, 2002; Martin-Cortecero and Nuñez, 2016; Yuan et al., 1985).

610

| <b>Experiment</b>                                                                                                                                                              | <b>Age</b>                                                                                                                                 | <b>Number of Rats</b> |
|--------------------------------------------------------------------------------------------------------------------------------------------------------------------------------|--------------------------------------------------------------------------------------------------------------------------------------------|-----------------------|
| Optogenetic inhibition of MT axon terminals in prelimbic cortex on decision-making tasks                                                                                       | Habituation and behavioral training started at 4-5 weeks, surgery performed at 9 weeks and behavioral testing performed at 11 and 12 weeks | 22                    |
| Chemogenetic inhibition of MT striatal-projecting neurons on decision-making tasks                                                                                             | Habituation and behavioral training started at 4-5 weeks, surgery performed at 9 weeks and behavioral testing performed at 12 weeks        | 24                    |
| Electrophysiology in anesthetized rats to explore effects of MT stimulation and simultaneous MT axon terminal inhibition on deeper layer pyramidal neurons in prelimbic cortex | Surgery at 9 weeks and electrophysiology performed at 11 weeks                                                                             | 1                     |
|                                                                                                                                                                                | Surgery at 10 weeks and electrophysiology performed at 12 weeks                                                                            | 2                     |
|                                                                                                                                                                                | Surgery at 11 weeks and electrophysiology performed at 13 weeks                                                                            | 1                     |

|                                                                                                                    |                                                                 |   |
|--------------------------------------------------------------------------------------------------------------------|-----------------------------------------------------------------|---|
| Electrophysiology in anesthetized rats to explore effects of MT stimulation and simultaneous inhibition of layer 1 | Surgery at 9 weeks and electrophysiology performed at 11 weeks  | 1 |
| inhibitory interneurons on deeper layer pyramidal neurons in prelimbic cortex                                      | Surgery at 10 weeks and electrophysiology performed at 12 weeks | 2 |

611 **Table 1.** Overview of Used Rats. Age and number of rats used in each experiment.

612

613 All applicable international, national, and/or institutional guidelines for the care and use of  
 614 animals were followed. All procedures performed in studies involving animals were in  
 615 accordance with the ethical standards of the Okinawa Institute of Science and Technology  
 616 Graduate University and were approved by the Animal Care and Use Committee of the  
 617 Okinawa Institute of Science and Technology Graduate University (protocols #2016-131 and  
 618 #2018-212).

619

## 620 *2. Behavioral Tasks*

621 Forty-six 4- to 5-week-old Sprague-Dawley rats were trained on a benefit-benefit, cost-cost  
 622 and cost-benefit decision-making task. Behavioral tasks were modeled after similar  
 623 behavioral tasks presented in a previous study (Friedman et al., 2015). Rats were trained 6 to  
 624 7 days a week for up to 24 days.

625

### 626 *2.1 Apparatus*

627 Behavioral training and testing were conducted in three standard modular test chambers for  
 628 rats, two of which had a drug infusion top (Med Associates, ENV-008 and ENV-008CT).

629 Each test chamber was enclosed in a custom-made sound-attenuating cubicle and connected  
630 to a personal computer by a SmartCtrl connection panel (Med Associates, SG-716B) and a  
631 SmartCtrl interface module (Med Associates, DIG-716B). In each test chamber a modified  
632 pellet/liquid drop receptacle (Med Associates, ENV-200R3M) was located at the center of the  
633 front panel. Two small food trays were attached to the front of the modified receptacle and  
634 two blunt needles were placed on top of these small food trays to deliver two different liquids  
635 into them. Liquids were delivered using two single speed syringe pumps (Med Associates,  
636 PHM-100-3.33) and 50 ml lock type plastic syringes (Terumo). Two retractable levers (Med  
637 Associates, ENV-112CM) were placed on each side of the modified receptacle. A white  
638 stimulus light (Med Associates, ENV-221M) was mounted above each lever. Stimulus lights  
639 were connected to a two level stimulus light fader controller (Med Associates, ENV-226) and  
640 could reach a maximum intensity of 200 lx or be reduced to an intensity of 1 lx. Each test  
641 chamber was further fitted with a 2900 Hz sonalert module (Med Associate, ENV-223AM),  
642 which was mounted in the upper left corner of the front response panel. A 15W LED light  
643 (12VMonster, P-15W-E27-CW-12V85V) was placed above each test chamber in a 12V lamp  
644 holder (12VMonster, WIRE-E27-2.1MM-2.5M-BLACK) and connected to a SmartCtrl  
645 connection panel (Med Associates, SG-716B) by a custom-made electrical circuit board. The  
646 SmartCtrl connection panel was connected to a personal computer by a SmartCtrl interface  
647 module (Med Associates, DIG-716B). Chronically implanted LED fiber optics, which  
648 emitted 590 nm light (TeleLC-Y-8-250, Bio Research Center Co., Ltd.), were controlled by a  
649 wireless receiver (TeleR-1-C, Bio Research Center Co., Ltd.). Prior to each behavioral  
650 training session, a wireless receiver was secured to the head of each animal and connected to  
651 the implanted LED fiber optic. Each wireless receiver was remote-controlled by an infrared  
652 signal using a Teleopto Remote (Bio Research Center Co., Ltd.) and a Teleopto Emitter (Bio  
653 Research Center Co., Ltd.). Both were placed behind each test chamber. Teleopto Remotes

654 were connected to a personal computer by a passive TTL connection panel (Med Associates,  
655 SG-726-TTL) and a SuperPort TTL output interface module (Med Associates, DIG-726TTL-  
656 G). The hardware was operated using the Med-PC IV software suite (Med Associates, SOF-  
657 735).

658

## 659 *2.2 Habituation and Lever Pressing Training*

660 Rats were put on a reversed light cycle (lights on at 2200h, lights off at 1000h) at least 7 days  
661 prior to the start of behavioral training, and were handled by the experimenter for at least 3  
662 days out of the 5 days prior to the start of behavioral training. Rats were habituated to 20%  
663 sweetened condensed milk diluted in tap water prior to the start of behavioral training. For  
664 each animal, 20 mL of 20% sweetened condensed milk diluted in tap water were placed in  
665 the home cage on 2 consecutive days out of the 5 days prior to the start of behavioral  
666 training.

667

668 We first trained rats to press one of two retractable levers using a modified continuous  
669 reinforcement schedule. Each training session started with a 5-second-long tone stimulus  
670 (2900 Hz, 65db) and 5 secs later one of the two retractable levers was presented to the  
671 animal. Each lever press resulted in retraction of the lever, delivery of 0.1 mL of 20%  
672 sweetened condensed milk diluted in tap water and presentation of the stimulus light above  
673 the lever at reduced intensity (1 lx) for 10 secs. Once the stimulus light was turned off, a 10-  
674 second-long pause occurred. Next, we presented another 5-second-long tone stimulus (2900  
675 Hz, 65db) to the animal and after another 5 secs the same retractable lever was presented to  
676 the animal again. Rats were presented with one 40-minute-long training session each day for  
677 up to 12 days. In each training session only one lever was presented to the animal. The  
678 presented lever was alternated each day, unless rats had previously reached criterion on one

679 of the two levers, i.e. performed 30 lever presses on the lever in 40 mins. If this was the case,  
680 on subsequent days rats were solely trained on the lever that they had not yet reached  
681 criterion on. For each of the two levers rats had a total of 6 days to reach criterion, i.e. a  
682 maximum of 12 days in total. If rats did not press the presented lever at least one time on two  
683 consecutive days, the behavior of rats was shaped by the experimenter. The animal's paw was  
684 placed on the lever and moved downwards to press the lever. Afterwards the animal was  
685 moved to the food tray to collect the reward. Shaping was performed for 5 consecutive lever  
686 presses. Rats reached criterion on the lever pressing training in an average of 5.1 +/- 2.3 days  
687 (mean +/- standard deviation).

688

### 689 *2.3 Behavioral Training*

690 Once rats reached criterion on both levers in the lever pressing training, they were trained to  
691 perform the benefit-benefit, cost-cost and cost-benefit decision-making task. Rats were  
692 always trained first on the benefit-benefit, then on the cost-cost, and last on the cost-benefit  
693 decision-making task. Each day rats completed 40 trials in the decision-making task that they  
694 were currently trained on. Each trial started with a 5-second-long tone stimulus (2900 Hz, 65  
695 dB) or, in the cost-cost and cost-benefit decision-making task a 5-second-long tone stimulus  
696 paired with a 100-millisecond-long bright light flash (1.75 kLx). After an additional 5 secs  
697 both retractable levers were presented to the animal for up to 10 secs or until a response was  
698 made. If the animal made no response within 10 secs, both levers were retracted, and the trial  
699 was counted as omitted.

700

701 In each of the three tasks rats were presented a choice between two levers and each lever was  
702 associated with a specific combination of benefit and cost. In the benefit-benefit decision-  
703 making task, pressing either of the two levers resulted in the presentation of a low cost, i.e. a



704 dim light at 1 lx, for 10s. However, pressing one lever resulted in the delivery of a high  
705 benefit (0.1 mL of sweetened condensed milk diluted at 20%), while pressing the other lever  
706 resulted in delivery of a low benefit (for training 0.1 mL of sweetened condensed milk  
707 diluted at 5%, for testing 0.1 mL of sweetened condensed milk diluted at 1-19% or pure tap  
708 water). In the cost-cost decision-making task pressing either of the two levers resulted in  
709 delivery of a high benefit (0.1 mL of sweetened condensed milk diluted at 20%). However,  
710 pressing one lever was associated with presentation of a high cost, i.e. a bright light stimulus  
711 (1.75 kLx), for 10s. In contrast, pressing the second lever was associated with presentation of  
712 a low cost, i.e. a dim light (1 lx), for 10s. In the cost-benefit decision-making task one lever  
713 was associated with a high cost-high benefit option and pressing the lever resulted in a 10-  
714 second-long presentation of a bright light stimulus (1.75 kLx) paired with delivery of a high  
715 benefit (0.1 mL of sweetened condensed milk diluted at 20%). In contrast, the other lever was  
716 associated with a low cost-low benefit option and pressing that lever resulted in a 10-second-  
717 long presentation of a dim light (1 lx) paired with delivery of a low benefit (for training 0.1  
718 mL of sweetened condensed milk diluted at 5%, for testing 0.1 mL of sweetened condensed  
719 milk diluted at 1-19% or pure tap water). Each trial was followed by an inter-trial interval of  
720 25 secs.

721

722 Rats were trained on each of the three decision-making tasks for at least 3 days and until  
723 criterion was reached. Rats that did not reach criterion after 6 days of training on the benefit-  
724 benefit and cost-benefit decision-making task, or after 8 days of training on the cost-cost  
725 decision-making task were excluded from the experiment. Criterion on all three decision-  
726 making tasks was that less than 20% of trials were omitted. In addition, in the benefit-benefit  
727 decision-making task rats had to choose the high benefit option and in the cost-cost decision-  
728 making task the low cost option on at least 52% of the trials. Overall, 53.7% of rats were able

729 to learn the task. Reported animal numbers only include rats that reached criterion and were  
730 included in the data analysis. Across rats that learned all three decision-making tasks,  
731 criterion was reached in an average of 3.3 +/- 0.7 days on the benefit-benefit decision-  
732 making, in an average of 4.3 +/- 1.7 days on the cost-cost decision-making task, and in an  
733 average of 2.4 +/- 1.2 days on the cost-benefit decision-making task (mean +/- standard  
734 deviation).

735

736 The perceived value of different dilutions of sweetened condensed milk offered as a benefit  
737 differed across rats. Hence, we used the first three days of behavioral training on the cost-  
738 benefit decision-making task to estimate an individual dilution of sweetened condensed milk  
739 for each animal such that rats would choose both, the high cost-high benefit and the low cost-  
740 low benefit option in approximately 50% of cost-benefit decision-making trials. The dilution  
741 of the sweetened condensed milk offered as a low benefit was systematically varied across  
742 the 120 trials presented over the first 3 days of behavioral training on the cost-benefit  
743 decision-making task. The dilution was reduced every 20 trials starting at 13% followed by  
744 11%, 8%, 5%, 2% and then pure tap water. For each dilution the percentage of trials that the  
745 animal chose the low cost-low benefit option out of the overall number trials that were not  
746 omitted was calculated and a psychometric curve was fitted to the data to estimate the best  
747 dilution of sweetened condensed milk for each animal. The psychometric curve was fitted  
748 using the FitWeibull function from the PsychoPy package (Peirce, 2007) under Python 2.7  
749 (since PsychoPy is no longer functional under Python 2.7, the source code that is made  
750 available was updated to run under Python 3). For each animal, guesses for the threshold and  
751 slope of the psychometric curve were made by the experimenter based on the collected data.  
752 Usually, the guess for the threshold was equal to the dilution at which rats chose the low cost-  
753 low benefit option in about 50% of the trials. The initial guess for the slope was 2, but if no

754 optimal parameters for the psychometric curve were found by the function, the parameter for  
755 the slope was increased to 5 and then doubled until optimal parameters were determined. The  
756 resulting dilution of sweetened condensed milk was rounded to the nearest whole number.  
757 Given that the individual dilution of sweetened condensed milk for each animal was  
758 determined during training on the cost-benefit decision-making task, the individual dilution  
759 could not be used for initial training on the benefit-benefit decision-making task. Thus, on the  
760 benefit-benefit decision-making task all rats were trained with a low benefit of 0.1 ml  
761 sweetened condensed milk diluted at 5%.

762

## 763 *2.4 Behavioral Testing*

### 764 *2.4.1 Optogenetic Inhibition of MT axon terminals in prelimbic cortical layer 1*

765 Once rats had reached criterion on all three decision-making tasks and were 9 weeks of age,  
766 50-70 nl of either AAV5-CAG-ArchT-GFP (titer  $\geq 7 \times 10^{12}$  vg/mL; gift from Edward Boyden  
767 and purchased through UNC Vector Core; now commercially available from Addgene viral  
768 preparation #29777-AAV5; <http://n2t.net/addgene:29777>; RRID:Addgene\_29777) or the  
769 control virus AAV5-CAG-GFP (titer  $\geq 7 \times 10^{12}$  vg/mL; gift from Edward Boyden and  
770 purchased through UNC Vector Core; now commercially available from Addgene viral  
771 preparation #37825-AAV5; <http://n2t.net/addgene:37825>; RRID:Addgene\_37825) were  
772 injected into MT. In the same aseptic surgery, a short optical fiber attached to a 590 nm light  
773 emitting diode (LED fiber optic) was implanted through the contralateral hemisphere into  
774 ipsilateral prelimbic cortical layer 1. As described above, LED fiber optics were controlled by  
775 wireless receivers. The maximum light intensity that was reached using the wireless receivers  
776 and LED fiber optics was between 0.7-1.2 mW. Given that LED fiber optics had a diameter  
777 250  $\mu\text{m}$ , the emitted 590 nm light reached approximately 3-6 mW/mm<sup>2</sup>.

778

779 After a 12- to 16-day-long recovery period that followed surgery, rats' choice behavior on  
780 each decision-making task was assessed over a period of 9 days. For each decision-making  
781 task, rats were presented with 40 trials per day on 3 consecutive days. The first 20 trials were  
782 presented without delivery of the 590 nm light (light OFF) and the last 20 trials were paired  
783 with delivery of the 590 nm light (light ON), which induced optogenetic inhibition of MT  
784 axon terminals in prelimbic cortical layer 1 in ArchT rats. In total, we presented rats with 60  
785 light OFF and 60 light ON trials on each decision-making task. The 590 nm light was turned  
786 on at the same time as the tone stimulus and remained on until rats made a choice or until the  
787 levers were retracted, i.e. a maximum of 20 secs. We decided on a block design for  
788 presentation of light OFF and ON trials, since a previous study suggested that sustained  
789 optogenetic inhibition of axon terminals may cause unexpected long-term effects such as an  
790 increase in spontaneous neurotransmitter release (Mahn et al., 2016). Hence, light ON trials  
791 were always presented after light OFF trials. All rats were first tested on the benefit-benefit,  
792 then on the cost-cost and last on the cost-benefit decision-making task. We presented the  
793 decision-making tasks in this specific order, to increase rats' retention of the tasks. A timeline  
794 for behavioral testing is provided in Figure 6.  
795

### Behavioral Training

| Lever pressing:                        | Benefit-benefit training:                                                     | Cost-cost training:                                                                                  | Cost-benefit training:                              |
|----------------------------------------|-------------------------------------------------------------------------------|------------------------------------------------------------------------------------------------------|-----------------------------------------------------|
| 2-12 days;<br>40 min/day               | 3-6 days, 40 trials per day                                                   | 3-8 days, 40 trials per day                                                                          | 3-6 days, 40 trials per day                         |
| <b>Criterion:</b><br>30 presses/40 min | <b>Criterion:</b> Responses<br>in ≥80% of trials; choice<br>in ≥52% of trials | <b>Criterion:</b> Responses<br>in ≥80% of trials; choice<br>of high cost option in<br><48% of trials | <b>Criterion:</b><br>Responses in ≥80%<br>of trials |

### Behavioral Testing - Optogenetic Inhibition of MT Axon Terminals in Prelimbic Cortical Layer 1

| Surgery | Recovery   | Benefit-benefit testing:                                                    | Cost-cost testing:                                                          | Cost-benefit testing:                                                       |
|---------|------------|-----------------------------------------------------------------------------|-----------------------------------------------------------------------------|-----------------------------------------------------------------------------|
|         | 12-16 days | 3 consecutive days                                                          | 3 consecutive days                                                          | 3 consecutive days                                                          |
|         |            | <b>Optogenetic inhibition:</b><br>20 trials OFF followed<br>by 20 trials ON | <b>Optogenetic inhibition:</b><br>20 trials OFF followed<br>by 20 trials ON | <b>Optogenetic inhibition:</b><br>20 trials OFF followed<br>by 20 trials ON |

### Behavioral Testing - Chemogenetic Inhibition of MT Striatal-Projecting Neurons

| Surgery | Recovery   | Benefit-benefit testing:                                                                                                        | Cost-cost testing:                                                                                                              | Cost-benefit testing:                                                                                                           |
|---------|------------|---------------------------------------------------------------------------------------------------------------------------------|---------------------------------------------------------------------------------------------------------------------------------|---------------------------------------------------------------------------------------------------------------------------------|
|         | 19-25 days | 2 consecutive days                                                                                                              | 2 consecutive days                                                                                                              | 2 consecutive days                                                                                                              |
|         |            | <b>Chemogenetic inhibition:</b> 60 trials/1day<br>with saline and 60 trials/<br>1 day with D21 agonist<br>injection (0.1 mg/kg) | <b>Chemogenetic inhibition:</b> 60 trials/1day<br>with saline and 60 trials/<br>1 day with D21 agonist<br>injection (0.1 mg/kg) | <b>Chemogenetic inhibition:</b> 60 trials/1day<br>with saline and 60 trials/<br>1 day with D21 agonist<br>injection (0.1 mg/kg) |

796

797 **Figure 6.** Timeline of behavioral training and testing for behavioral experiments assessing  
798 the effect of optogenetic inhibition of MT axon terminals in prelimbic cortical layer 1 and  
799 chemogenetic inhibition of MT striatal-projecting neurons.

800

#### 801 2.4.2 Chemogenetic Inhibition of MT Thalamostriatal Projection Neurons

802 Once rats had reached criterion on all three decision-making tasks and were 9 weeks of age,  
803 50-60 nl of either AAV5-hSyn-DIO-hM4D(Gi)-mCherry (titer  $\geq 7 \times 10^{12}$  vg/mL; gift from  
804 Bryan Roth, Addgene viral preparation #44362-AAV5; <http://n2t.net/addgene:44362>; RRID:  
805 Addgene\_44362) or the control virus AAV5-hSyn-DIO-mCherry (titer  $\geq 7 \times 10^{12}$  vg/mL; gift  
806 from Bryan Roth, Addgene viral preparation #50459-AAV5; <http://n2t.net/addgene:50459>;  
807 RRID: Addgene\_50459) were injected into MT, followed by an injection of 300 nl  
808 of AAVrg-pmSyn1-EBFP-Cre (titer:  $6 \times 10^{12}$  vg/mL; gift from Hongkui Zeng; Addgene viral  
809 preparation #51507-AAVrg; RRID: Addgene\_51507) into striatum. After a 19- to 25-day-  
810 long recovery period that followed surgery, rats' choice behavior on each decision-making

811 task was assessed over a period of 6 days. All rats were first tested on the benefit-benefit,  
812 then on the cost-cost and last on the cost-benefit decision-making task. For each decision-  
813 making task rats were presented with 60 trials per day on two consecutive days. One of the  
814 two days rats received intraperitoneal injections of D21 agonist diluted in saline (1 mg/kg),  
815 while on the other day rats were injected with the same amount of saline. Injections were  
816 given 10-15 minutes prior to the experiment. A timeline for behavioral testing is provided in  
817 Supplementary Figure 5.

818

### 819 *2.5 Randomization of Animal Groups*

820 For lever pressing training for one group of rats the left lever was presented on the first day  
821 and the right lever on the second day, while for a second group of rats the right lever was  
822 presented on the first day and the second lever was presented on the second day. For  
823 behavioral training and testing for one group of rats the left and for a second group of rats the  
824 right lever was associated with the high benefit, high cost and high cost-high benefit option.  
825 The lever on the opposite side was associated with the other choice option. Rats were pseudo-  
826 randomly assigned to these groups. Rats were further pseudo-randomly assigned to being  
827 injected with AAV5-CAG-ArchT-GFP/AAV5-hSyn-DIO-hM4D(Gi)-mCherry or the  
828 corresponding control virus.

829

### 830 *2. Surgeries*

831 Virus injections, LED fiber optics or both were placed in 9- to 11-week-old male Sprague-  
832 Dawley rats. Rats were anesthetized with 5% isoflurane delivered with room air (0.5-1  
833 L/min; Small Animal Anesthetizer, Muromachi, MK-A100, Japan). Rats were positioned in a  
834 stereotaxic frame (Narishige, SR-5R-HT, Japan) and anesthesia was maintained at 2%  
835 isoflurane delivered with room air (0.5-1 L/min). Virus injections were performed with a

836 Hamilton syringe (Neuros Syringe, 0.5  $\mu$ L, Neuros Model 7000.5 KH, point style 3,  
837 Hamilton, 65457-01, United Kingdom or Neuros Syringe, 1.0  $\mu$ L, Neuros Model 7001 KH,  
838 point style 3, Hamilton, 65458-01, United Kingdom) at an injection speed of 100 nL/min and  
839 the syringe remained at the target location for 10 min after the injection before it was slowly  
840 retracted from the brain. All experiments involving recombinant DNA were approved by the  
841 Biosafety Committee of the Okinawa Institute of Science and Technology Graduate  
842 University (protocol #RDE-2017-003) and all applicable international, national, and/or  
843 institutional guidelines were followed.

844

845 For electrophysiological experiments in anesthetized rats, unilateral injections of 50-70 nL  
846 AAV5-CAG-ArchT-GFP (titer  $\geq 7 \times 10^{12}$  vg/mL; gift from Edward Boyden and purchased  
847 through UNC Vector Core; now commercially available from Addgene viral preparation  
848 #29777-AAV5; <http://n2t.net/addgene:29777>; RRID:Addgene\_29777) were placed in MT  
849 (from interaural zero AP +7.76 to +9.97, ML -1.2, from dura DV -6.6; Paxinos and Watson,  
850 2004) or in prelimbic cortical layer 1 (from bregma AP +1.32 mm, ML +0.8 mm with the  
851 stereotaxic rotated at a 30° angle towards posterior, from dura DV -3.58 mm with the  
852 stereotaxic tilted at a 30° angle; Paxinos and Watson, 2004). Experiments were performed  
853 12-16 days after the virus was injected and rats were perfused after the experiment.

854

855 For behavioral experiments that tested the effects of optogenetic inhibition of MT axon  
856 terminals in prelimbic cortical layer 1 unilateral injections of 50-70 nL AAV5-CAG-ArchT-  
857 GFP (titer  $\geq 7 \times 10^{12}$  vg/mL; gift from Edward Boyden and purchased through UNC Vector  
858 Core; now commercially available from Addgene viral preparation #29777-AAV5;  
859 <http://n2t.net/addgene:29777>; RRID:Addgene\_29777) or 50-70 nL AAV5-CAG-GFP (titer  $\geq$   
860  $7 \times 10^{12}$  vg/mL; gift from Edward Boyden and purchased through UNC Vector Core; now

861 commercially available from Addgene viral preparation #37825-AAV5;  
862 <http://n2t.net/addgene:37825>; RRID:Addgene\_37825) were placed in MT (from interaural  
863 zero AP +6.31 to +10.26, ML -1.2, from dura DV -6.6; Paxinos and Watson, 2004). In  
864 addition, a LED fiber optic with a diameter of 250  $\mu\text{m}$  and emitting 590 nm (TeleLC-Y-8-  
865 250, Bio Research Center Co., Ltd.) was chronically implanted into prelimbic layer 1 (from  
866 bregma AP +0.898 mm, ML +1.084 mm with stereotaxic turned at a 30° angle towards  
867 posterior, from dura DV -3.58 mm with the stereotaxic tilted at a 30° angle; Paxinos and  
868 Watson, 2004) and fixed to the skull with dental cement (Super-Bond C&B, Sun Medical,  
869 Japan) in the same aseptic surgery. Behavioral testing was conducted after a recovery period  
870 of 12-16 days and rats were perfused after 26-28 days.

871

872 For behavioral experiments that tested the effects of chemogenetic inhibition of MT  
873 thalamostriatal projections neurons unilateral injections of 50-60 nL AAV5-hSyn-DIO-  
874 hM4D(Gi)-mCherry (titer  $\geq 7 \times 10^{12}$  vg/mL; gift from Bryan Roth, Addgene viral preparation  
875 #44362-AAV5; <http://n2t.net/addgene:44362>; RRID: Addgene\_44362) or 50-60 nL AAV5-  
876 hSyn-DIO-mCherry (titer  $\geq 7 \times 10^{12}$  vg/mL; gift from Bryan Roth, Addgene viral preparation  
877 #50459-AAV5; <http://n2t.net/addgene:50459>; RRID: Addgene\_50459) were placed in MT  
878 (from interaural zero AP +7.19 to +10.61, ML -1.2, from dura DV -6.6; Paxinos and Watson,  
879 2004). In addition, a second injection of 300 nL AAVrg-pmSyn1-EBFP-Cre (titer:  $6 \times 10^{12}$   
880 vg/mL; gift from Hongkui Zeng; Addgene viral preparation #51507-AAVrg; RRID:  
881 Addgene\_51507) was placed in striatum (from bregma AP +0.4 mm, ML +3.7 mm, from  
882 dura DV -6.1 mm; Paxinos and Watson, 2004) in the same aseptic surgery. Behavioral testing  
883 was conducted after a recovery period of 19-25 days and rats were perfused after 28-32 days.

884

885



886 *3. In-vivo Electrophysiology*

887 12-16 days after an AAV5-CAG-ArchT-GFP injection had been placed into MT or prelimbic  
888 layer 1, rats were anesthetized with 5% isoflurane delivered with room air (1.5-2 L/min,  
889 Classic T3 Vaporizer, SurgiVet) and positioned in a stereotaxic frame (custom-build from a  
890 Model 1730 Intracellular Frame Assembly from David Kopf Instruments). Anesthesia was  
891 maintained at 1.5-2% isoflurane delivered with room air (1.5-2 L/min). An optical fiber with  
892 a diameter of 250  $\mu\text{m}$  connected to a 590 nm fiber-coupled LED (ThorLabs, M590F2) that  
893 was powered by a high-power, 1-channel LED driver with pulse modulation (ThorLabs,  
894 DC2100) was placed in prelimbic layer 1 (from bregma AP +0.898 mm, ML +1.084 mm with  
895 stereotaxic turned at a 30° angle towards posterior, from dura DV -3.58 mm with the  
896 stereotaxic tilted at a 30° angle)(Paxinos and Watson, 2004). A concentric bipolar  
897 platinum/iridium microelectrode with a wire diameter of 25  $\mu\text{m}$  (FHC, CBBPC75) was  
898 placed in close proximity to MT (from bregma AP -4.40 mm, ML -1.20 mm, from dura -6.98  
899 mm with the stereotaxic tilted at a 20° angle)(Paxinos and Watson, 2004) and was connected  
900 to a biphasic current stimulator (Digitimer, DS4) to stimulate MT and the ascending  
901 projections. Both, the 1-channel LED driver and the biphasic current stimulator, were  
902 connected to a personal computer by a low-noise data acquisition system (Molecular Devices,  
903 Axon CNS Digidata 1440A) that was controlled by Clampex 10.3 to deliver light pulses for  
904 optogenetic inhibition and microstimulation using a previously specified protocol. To  
905 perform extracellular recordings from neurons in deep layers of prelimbic cortex, glass  
906 electrodes with an impedance between 50-110  $\text{M}\Omega$  were pulled on a P-1000 micropipette  
907 puller (Sutter Instrument, P-1000) and placed in prelimbic cortex in lower layer 2/3, layer 4  
908 or layer 5A. Glass electrodes were filled with an internal solution of 3.0 molar potassium  
909 methyl sulfate (KMeSO<sub>4</sub>) that contained goat anti-rat AlexaFluor 594 at a dilution between  
910 1:50 to 1:200, and were coated with 1,1'-dioctadecyl-3,3,3',3'-tetramethylindocarbocyanine

911 perchlorate stain (DiI stain, 2.5 mg/ml, Thermo Fisher, D282) diluted in one part of ethanol  
912 and 9 parts of water. Glass electrodes were connected to a personal computer by a low-noise  
913 data acquisition system (Molecular Devices, Axon CNS Digidata 1440A), a Hum Bug Noise  
914 Eliminator (Quest Scientific) and a computer-controlled microelectrode amplifier (Molecular  
915 Devices, Axon CNS, Axoclamp 900A) and recordings were performed using the Axoclamp  
916 900A software and Clampex 10.3.

917

918 Glass electrodes were slowly lowered to the dorsal end of prelimbic cortex in 10  $\mu\text{m}$  steps  
919 and then slowly advanced to the ventral end of prelimbic cortex in 0.2-1  $\mu\text{m}$  steps using a  
920 micropositioner (David Kopf Instruments, Model 2660). When spiking activity of a neuronal  
921 cluster was observed, a protocol was run to stimulate MT and the ascending projections (light  
922 OFF trials). For rats, in which AAV5-CAG-ArchT-GFP had been injected into MT, the  
923 protocol consisted of 10 sweeps, while for rats that had received AAV5-CAG-ArchT-GFP  
924 into prelimbic layer 1, the protocol consisted of 5 sweeps. In both cases, each sweep started  
925 with ten 0.5 ms stimulations at -5 mA that were delivered over 1 sec at a rate of 10 Hz  
926 followed by a 3-seconds-long pause before the next sweep started. Data was digitized at  
927 250000 Hz. If stimulation of MT and the ascending projections induced spiking activity in a  
928 recorded neuronal cluster in prelimbic layers 2/3, 4 or 5A, a second protocol was run. For  
929 rats, in which AAV5-CAG-ArchT-GFP had been injected into MT, the protocol was run to  
930 determine, whether optogenetic inhibition of MT axon terminals in prelimbic layer 1 reduced  
931 spiking activity in the recorded neuronal clusters in prelimbic cortical layers 2/3, 4 or 5A.  
932 The protocol consisted of two sweeps. In each sweep the 590 nm light was delivered to  
933 prelimbic layer 1 for the first 20 seconds of the sweep (light ON trials). Simultaneously, the  
934 protocol featured five iterations of delivering ten 0.5-millisecond-long MT stimulations at -  
935 5mA at 10 Hz over a period of 1 second followed by a 3-second-long pause. Twenty seconds

936 of light delivery were followed by a 4 secs pause before the next sweep started. Data was  
937 digitized at 20000 Hz.

938

939 For rats that had received AAV5-CAG-ArchT-GFP injections into prelimbic cortical layer 1  
940 instead a second protocol was run to determine, whether activation of archaerhodopsin that  
941 induced optogenetic inhibition in layer 1 inhibitory interneurons increased or reduced spiking  
942 activity in the recorded neuronal clusters in prelimbic layers 2/3, 4 or 5A. The protocol  
943 consisted of three sweeps. In each sweep the 590 nm light was delivered to prelimbic layer 1  
944 for the first 20 seconds of the sweep (light ON trials). Simultaneously, on the first sweep the  
945 protocol featured five iterations of delivering ten 0.5-millisecond-long MT stimulations at -  
946 5mA at 10 Hz over a period of 1 second followed by a 3-second-long pause. On the second  
947 sweep, light delivery was combined with five iterations of delivering ten 0.5-millisecond-  
948 long MT stimulations at -3mA at 10 Hz over a period of 1 second followed by a 3-second-  
949 long pause. On the third sweep, light delivery was combined with five iterations of delivering  
950 ten 0.5-millisecond-long MT stimulations at -1mA at 10 Hz over a period of 1 second  
951 followed by a 3-second-long pause. Twenty seconds of light delivery were always followed  
952 by a 4-second-long pause before the next sweep started. Data was digitized at 20000 Hz. All  
953 data was recorded using a high-band pass filter at 100 Hz and a lowpass Bessel filter at 1  
954 kHz.

955

#### 956 *4. Perfusion*

957 Rats were anesthetized with approximately 10 ml isoflurane delivered on tissue paper and  
958 medetomidine hydrochloride (1.0 mg/kg, intraperitoneal), before being transcardially  
959 perfused with either 100 mL 0.1 M phosphate buffer with 2 mg/100 mL heparin (4 °C,  
960 pH7.4) or 100 mL of 10% sucrose diluted in Milli-Q, both followed by 150 mL Lana's

961 fixative (room temperature, 4% depolymerized paraformaldehyde and 14% saturated picric  
962 acid solution, Sigma Aldrich, P6744-1GA, in 0.16 M phosphate buffer, pH7.4). Brain tissue  
963 was post-fixed for at least 36 h and afterward stored in a 50/50 mixture of Lana's fixative and  
964 20% sucrose in phosphate-buffered saline (PBS) until sectioning, i.e. a minimum of 36 h and  
965 up to 2 months.

966

### 967 *5. Immunohistochemistry*

968 80 µm-thick coronal or sagittal sections that contained prelimbic cortex (interaural zero  
969 +11.52 to +13.68; Paxinos and Watson, 2004), striatum (interaural zero +8.40 to +11.28;  
970 Paxinos and Watson, 2004) and/or MT (interaural zero +4.80 to +8.76; Paxinos and Watson,  
971 2004) were taken using a freezing microtome (Yamato, REM-710, Japan). For some sections  
972 no immunohistochemistry was performed. These sections were washed in PBS for 4 x 5 min  
973 before being mounted. When immunohistochemistry was performed, sections were first  
974 washed in PBS for 3 x 5 min. Next, sections were incubated in 20% goat serum (Vector  
975 Laboratories, S-1000) or, when the primary antibody was grown in goat, in 20% donkey  
976 serum (Millipore, S30-100ML) diluted in PBS, containing 0.05% sodium azide and 0.3%  
977 Triton X-100 (Sigma Aldrich, 234729-100ML), at room temperature for 1h. Afterward,  
978 sections were incubated for 18h-36h at 4°C in primary antibody solution containing primary  
979 antibodies diluted in PBS, 0.05% sodium azide and 0.3% Triton X-100. Then, sections were  
980 washed in PBS for 3 x 5 min before being incubated at room temperature for 3h in secondary  
981 antibody solution containing secondary antibodies diluted in PBS, 0.05% sodium azide and  
982 0.3% Triton X-100. Finally, sections were washed in PBS for 4 x 5 min. Dilutions of primary  
983 and secondary antibodies varied depending on the antibodies used and are provided in table  
984 1. All sections were mounted on glass slides in several drops of mounting medium and sealed  
985 with a cover slip. We used UltraCruz Hard-set Mounting Medium with DAPI (Santa Cruz,

986 sc-359850) or Vectashield HardSet Mounting Medium with DAPI (Vector Laboratories, H-  
 987 1500) that also provided DNA counterstaining of cell nuclei. If a fluorochrome with an  
 988 emission spectrum within the blue wavelength was already present within the section, we  
 989 instead used VectaMount AQ (Vector Laboratories, H-5501). Secondary antibodies were  
 990 acquired from Millipore or Invitrogen.

991

| Primary antibody                                                                                                            | Secondary antibody                                                      |
|-----------------------------------------------------------------------------------------------------------------------------|-------------------------------------------------------------------------|
| Mouse anti-GAD67<br>(Millipore, MAB5406, RRID:AB_2278725):<br>1:1000 dilution, 0.3% Triton X-100,<br>18-36h incubation time | Alexa Fluor 594 goat anti-mouse:<br>1:200 dilution, 3h incubation time  |
| Rabbit anti-GFAP<br>(bioSensis, R-1374, RRID:AB_2492897):<br>1:1000 dilution, 0.3% Triton X-100,<br>18-36h incubation time  | Alexa Fluor 594 goat anti-rabbit:<br>1:200 dilution, 3h incubation time |
| Mouse anti-PV<br>(Sigma, P3088, RRID:AB_477329):<br>1:1000 dilution, 0.3% Triton X-100,<br>18h incubation time              | Alexa Fluor 488 goat anti-mouse:<br>1:200 dilution, 3h incubation time  |
| Rabbit anti-bNOS<br>(Sigma, N7280, RRID:AB_260796):<br>1:500 dilution, 0.3% Triton X-100,<br>18-36h incubation time         | Alexa Fluor 488 goat anti-rabbit:<br>1:200 dilution, 3h incubation time |

|                                                                                                                      |                                                                             |
|----------------------------------------------------------------------------------------------------------------------|-----------------------------------------------------------------------------|
| Goat anti-CHAT<br>(Millipore, AB144P, RRID:AB_2079751):<br>1:100 dilution, 0.3% Triton X-100,<br>18h incubation time | Alexa Fluor 488 donkey anti-goat:<br><br>1:200 dilution, 3h incubation time |
|----------------------------------------------------------------------------------------------------------------------|-----------------------------------------------------------------------------|

992 **Table 2.** Primary and secondary antibodies used in immunohistochemistry. A summary of  
993 dilutions of primary and secondary antibodies in respective antibody solutions, and the  
994 dilution of Triton X-100 in primary antibody solutions.

995

## 996 *6. Microscopy*

997 Histological verification of the placement of virus injections or LED fiber optics was  
998 performed with a fixed stage BX51WI upright microscope from Olympus. A 100W mercury  
999 lamp was used as a light source. Alexa Fluor 594 and mCherry were visualized using an  
1000 excitation filter with a peak at 555 nm and a bandwidth of 25 nm, and an emission filter with  
1001 a peak at 605 nm and a bandwidth of 25 nm. GFP was visualized using an excitation filter  
1002 with a peak at 484 nm and a bandwidth of 15 nm, and an emission filter with a peak at 517  
1003 nm and a bandwidth of 30 nm. Images were acquired with a 4x objective with a numerical  
1004 aperture (NA) of 0.16 with the NeuroLucida software (MBF Bioscience).

1005

1006 To acquire the high-resolution images presented in this paper, laser confocal scanning  
1007 microscopy was performed with a Zeiss LSM 780 microscope at room temperature. Images  
1008 were taken with a 10x objective with a NA of 0.45 or a 63x oil objective with a NA of 1.46  
1009 (both objectives from Zeiss). The 63x objective was used with fluorescence-free Immersol  
1010 immersion oil 518F from Zeiss. Any tiled overview images were acquired with 10% overlap  
1011 between tiles and stitched using the stitching algorithm provided by the ZEN 2011 SP7 FP1  
1012 software (Zeiss, black edition, version 14.0.8.201). An overview of the excitation and

1013 emission peaks of used fluorochromes, the light source and filter set used for excitation, and  
 1014 the emission range used are provided in Table 3.  
 1015

| Fluoro-<br>chrome  | Excitation | Emission | Light<br>Source       | Filter Set                                                                    | Emission<br>Range |
|--------------------|------------|----------|-----------------------|-------------------------------------------------------------------------------|-------------------|
| DAPI               | 358 nm     | 461 nm   | 405-30<br>laser diode | MBS 488/561/633 dichroic beam<br>splitter; MBS -405 dichroic beam<br>splitter | 410-495 nm        |
| GFP                | 395 nm     | 509 nm   | Argon<br>laser        | MBS 488 dichroic beam splitter                                                | 490-590 nm        |
| Alexa<br>Fluor 594 | 590 nm     | 617 nm   | DPSS 561-<br>10 laser | MBS 458/561 dichroic beam<br>splitter                                         | 585-734 nm        |
| mCherry            | 587 nm     | 610 nm   | DPSS 561-<br>10 laser | MBS 458/561 dichroic beam<br>splitter                                         | 578-696 nm        |

1016 **Table 3.** Used fluorochromes. Overview of the excitation and emission peak of used  
 1017 fluorochromes, the light source and filter set used for excitation, and the emission range used.

1018  
 1019 Images were acquired using the ZEN 2011 SP7 FP1 software (Zeiss, black edition, version  
 1020 14.0.8.201). Brightness and contrast were adjusted using ZEN 2011 SP7 FP1 software (Zeiss,  
 1021 black edition, version 14.0.8.201) and the “Enhance Contrast” option in Fiji (ImageJ version  
 1022 1.51n or 1.52p). When necessary, brightness and contrast were adjusted separately for each

1023 channel. For final publication, brightness and contrast of images were additionally adjusted  
1024 using Adobe Photoshop CS5 Extended (version 12.0.4 x64). Adjustments to brightness and  
1025 contrast were always applied equally across the entire image.

1026

## 1027 *7. Quantification and Statistical Analysis*

1028 To quantify and compare decision-making behavior of rats on the three decision-making  
1029 tasks, we primarily assessed the percentage of trials, in which rats chose 1) the high benefit  
1030 option on the benefit-benefit decision-making task, 2) the high cost option on the cost-cost-  
1031 decision-making task or 3) the high cost-high benefit option on the cost-benefit decision-  
1032 making task out of the total number of non-omitted trials.

1033

1034 In addition, to test whether motor function was disrupted by optogenetic inhibition of MT  
1035 axon terminals in prelimbic cortical layer 1 or by chemogenetic inhibition of MT striatal-  
1036 projecting neurons, we assessed 1) the percentage of omitted trials; and 2) the average  
1037 reaction time across all non-omitted trials.

1038

1039 Behavioral responses in each session were stored in an automatically generated text  
1040 document. We extracted any variables that were analyzed from these text documents using  
1041 custom-written Python 3.7 scripts. The reaction times stored in each text document  
1042 represented a measurement from the presentation of the tone stimulus marking the beginning  
1043 of each trial to the time rats indicated their choice by pressing one of the two levers.  
1044 However, reaction times extracted from the text documents were corrected to represent times  
1045 from presentation of the two levers to the time rats indicated their choice.

1046

1047 To analyze the effect of the injected virus, i.e. ArchT rats as compared to their controls or  
1048 hM4Di rats as compared to their controls, and the treatment, i.e. light ON versus OFF trials



1049 or D21 agonist versus saline trials, we performed separate ANOVAs for each decision-  
1050 making task and each variable using the injected virus as between and treatment as within  
1051 animal variable. When we observed a main or interaction effect, we performed two post-hoc  
1052 paired t-tests to compare the treatment and non-treatment condition within each group of rats.  
1053 To confirm that effects were not caused by pre-existing differences in behavior between the  
1054 two groups of rats, we further performed two Student's t-tests to compare behavior on the  
1055 first 20 trials of the last day of training as well as behavior in the non-treatment condition  
1056 between the two groups of rats. To confirm that effects were not caused by surgery, we also  
1057 compared the behavior pre- and post-surgery within each group of rats. We usually  
1058 performed 6 t-tests to analyze each behavioral variable. We applied a Bonferroni correction  
1059 to the significance level resulting in a significance level of  $p=0.0083$ . However, when  
1060 comparing the effect of optogenetic inhibition of MT axon terminals in prelimbic cortical  
1061 layer 1 on choice behavior, we also compared differences in choice behavior between light  
1062 ON and OFF trials for each individual day of behavioral testing. In addition, we compared  
1063 differences in the percentage of high benefit and high cost choices between the first and last  
1064 20 trials on the last three days of behavioral training. Overall, the number of statistical tests  
1065 resulted in an adjusted significance level of  $p=0.0028$ .

1066  
1067 We observed a significant difference in the percentage of high cost-high benefit choices  
1068 between light ON and OFF trials for ArchT rats. To quantify the size of the difference, we  
1069 subtracted the percentage in light OFF from that in light ON trials. We performed a Student's  
1070 t-test on this new metric (significance level of  $p=0.05$ ), comparing it between controls and  
1071 ArchT rats, to analyze whether the difference in the percentage of high cost-high benefit trials  
1072 was significantly different between the two groups of rats.

1073

1074 We adjusted individual dilutions of sweetened condensed milk for each animal, so that each  
1075 animal would choose the high cost-high benefit option as well as the low cost-low benefit  
1076 option in about 50% of non-omitted trials. We used the first 3 days of behavioral training on  
1077 the cost-benefit decision-making task to adjust individual dilutions. We systematically varied  
1078 the dilution of sweetened condensed milk on every 20 trials. Hence, data on the percentage of  
1079 high cost-high benefit choices, which was collected across these 3 days, does not represent  
1080 the actual choice behavior of rats on days after we determined and used their individual  
1081 dilutions. Only a few rats did not reach criterion on the cost-benefit decision-making task  
1082 within the first 3 days, resulting in few rats being trained for additional days. When running  
1083 statistical tests that involved data from the last day of behavioral training on the cost-benefit  
1084 decision-making task, we only used the data from the first 20 trials on the last day of  
1085 behavioral training for these few rats. For all other rats, when the determined individual  
1086 dilution corresponded to a dilution that was used during the adjustment process, we used data  
1087 from those 20 trials. Otherwise, when the individual dilution was between dilutions used  
1088 during the adjustment process, we averaged data from the 20 trials with the next higher and  
1089 the 20 trials with the next lower dilution. Given the limitations of this approach, we compared  
1090 a second metric between groups of rats to determine whether pseudo-random assignment of  
1091 rats to either the control or ArchT group influenced the percentage of high cost-high benefit  
1092 choices within each group. We analyzed for each group of rats whether the individual  
1093 dilution of sweetened condensed milk correlated with the percentage of high cost-high  
1094 benefit choices in light OFF trials during behavioral testing. We assumed that if these two  
1095 metrics did not correlate, pseudo-random assignment of rats would not have influenced the  
1096 percentage of high cost-high benefit choices in each group, even if the determined individual  
1097 dilutions of sweetened condensed milk would have varied vastly. We calculated Kendall's  
1098 Tau to determine the correlation between the two metrics. We chose Kendall's Tau since

1099 individual dilutions of sweetened condensed milk were rounded to the closest whole number  
1100 and, hence, on an ordinal scale. We chose Kendall's Tau over Spearman's rho due to the small  
1101 sample size and higher robustness of Kendall's Tau for small sample sizes.

1102

1103 Statistical analyses were performed in R (version 3.6.3). We tested the assumption of the data  
1104 being normal distributed, which is a prerequisite for parametric tests, with Levene's test and  
1105 the assumption of homogeneity of variances with Shapiro's test.

1106

1107 We used custom-written Matlab scripts (Matlab 2019b) to analyze electrophysiological data  
1108 collected in anesthetized rats. Data were filtered at 100 Hz to 10 kHz at the time of  
1109 recordings and no further filtering was done. To analyze the effect of optogenetic inhibition  
1110 of MT axon terminals or inhibitory interneurons in prelimbic cortical layer 1 on neuronal  
1111 cluster responses recorded in deep layers of prelimbic cortex, we defined segments starting  
1112 20 ms before and ending 80 ms after MT stimulations were delivered. We normalized each  
1113 data segment by subtracting the average activity measured across the last 40 ms of each  
1114 segment from each data point in the segment. MT stimulations induced an artefact, which  
1115 was truncated from any presented figures by removing data from the time of MT stimulation  
1116 until 2 ms after. For each cell, the threshold to identify extracellular spikes was determined  
1117 by using the Matlab 'findpeaks'-algorithm with a minimum spike prominence of 0.5 mV on  
1118 data segments from light OFF trials. We identified the spike with the largest spike  
1119 prominence and identified extracellular spikes by running the 'findpeaks'-algorithm again, but  
1120 using 30% of the largest identified spike prominence as minimum spike prominence. We  
1121 constructed a peri-stimulus time histogram with a bin width of 0.1 ms from the data. To  
1122 compare the average number of spikes per millisecond between light ON and OFF trials

1123 within the first 20 ms after MT stimulation, we conducted a Wilcoxon ranked-sign test across  
1124 cells.

1125

1126 To compare the width of spikes during segments of spontaneous activity, after MT  
1127 stimulation in light OFF trials and after MT stimulation in light ON trials, we analyzed the  
1128 last 2 seconds of each light OFF sweep. Each light OFF sweep started with ten MT  
1129 stimulations followed by a 3-second-long pause before the next sweep started. Spontaneous  
1130 activity was observed within this 3-second-long pause of which we analyzed the last 2  
1131 seconds. Data within these 2-second-long segments were normalized by subtracting the  
1132 average activity measured across the last 40 ms of each segment from each data point in the  
1133 segment. The width of spikes within these segments of spontaneous activity, for light OFF  
1134 and for light ON trials were identified by running the Matlab 'findpeaks'-algorithm and using  
1135 the previously determined value for minimum spike prominence. Spike widths were  
1136 summarized in histograms. In addition, segments showing activity after MT stimulation in  
1137 light OFF trials as well as spontaneous activity were plotted for selected cells.

1138

1139 To test whether rebound spiking was observed upon turning the 590 nm light off, which  
1140 deactivated the archaerhodopsin and terminated optogenetic inhibition of MT axon terminals,  
1141 we extracted segments from light ON trials starting 100 ms before and ending 100 ms after  
1142 the light was turned off. Data was normalized by subtracting the mean activity across each  
1143 segment from each data point in the segment. We again identified extracellular spikes by  
1144 running the Matlab 'findpeaks'-algorithm and using the previously determined value for  
1145 minimum spike prominence. We constructed a peri-stimulus time histogram from the data  
1146 using a bin size of 1 ms. In addition, the average number of spikes per second for the 100 ms

1147 before and the 100 ms after the light was turned off was calculated and indicated in the peri-  
 1148 stimulus time histogram by a red dotted line.

1149

1150 *8. Data Availability*

1151 Raw behavioral data, raw electrophysiology data and analysis scripts used to generate figure

1152 1 through 4 are available on Github (<https://github.com/bsiever/sieveritz-2022-mt->

1153 prelimbic). Microscopy data will be made available upon request.

1154

1155 **Appendix 1**

|                                 |                                                          | Training |                 |         |                 |         |                 | Testing |                 |         |                 |         |                 |
|---------------------------------|----------------------------------------------------------|----------|-----------------|---------|-----------------|---------|-----------------|---------|-----------------|---------|-----------------|---------|-----------------|
|                                 |                                                          | Day -3   |                 | Day -2  |                 | Day -1  |                 | Day 1   |                 | Day 2   |                 | Day 3   |                 |
|                                 |                                                          | p-value  | r (effect size) | p-value | r (effect size) | p-value | r (effect size) | p-value | r (effect size) | p-value | r (effect size) | p-value | r (effect size) |
| Benefit-Benefit Decision-Making | Change in High Benefit Choices (%), Controls             | 0.097    | 0.48            | 0.013   | 0.668           | 0.061   | 0.533           | 0.039   | 0.575           | 0.028   | 0.606           | 0.156   | 0.418           |
|                                 | Change in High Benefit Choices (%), ArchT Rats           | 0.007    | 0.757           | 0.156   | 0.459           | 0.002   | 0.821           | 0.179   | 0.437           | 0.073   | 0.561           | 0.113   | 0.505           |
| Cost-Cost Decision-Making       | Change in High Cost Choices (%), Controls                | 0.186    | 0.391           | 0.013   | 0.665           | 0.009   | 0.692           | 0.081   | 0.501           | 0.041   | 0.572           | 0.702   | 0.12            |
|                                 | Change in High Cost Choices (%), ArchT Rats              | 0.019    | 0.687           | 0.24    | 0.387           | 0.211   | 0.409           | 0.083   | 0.545           | 0.033   | 0.642           | 0.463   | 0.248           |
| Cost-Benefit Decision-Making    | Change in High Cost-High Benefit Choices (%), Controls   | N/A      | N/A             | N/A     | N/A             | 0.306   | 0.455           | 0.678   | 0.127           | 0.717   | 0.111           | 0.768   | 0.091           |
|                                 | Change in High Cost-High Benefit Choices (%), ArchT Rats | N/A      | N/A             | N/A     | N/A             | 0.282   | 0.602           | 0.012   | 0.725           | 0.0037  | 0.791           | 0.041   | 0.623           |

1156 **Appendix 1 - Table 1.** Overview of p-values and effect sizes for t-tests comparing choice  
 1157 behavior on each individual behavioral testing days and on the last three days of behavioral  
 1158 training. The percentage of high benefit, high cost or high cost-high benefit choices within  
 1159 each group of rats was compared between light ON and OFF trials for each individual day of  
 1160 behavioral testing, or between the first and last 20 trials on the last three days of behavioral  
 1161 training. Training day -1 indicates the last day of behavioral training, training day -2 the  
 1162 second to last day and training day -3 the day prior to the second to last day. To account for  
 1163 multiple comparisons, t-tests were conducted using a Bonferroni corrected significance level  
 1164 of  $p=0.0028$ .

1165

|                                 |                                          | High cost-high benefit/high benefit/high cost choices (%) |                 | Omitted Trials (%) |                 | Overall Reaction Time |                 |
|---------------------------------|------------------------------------------|-----------------------------------------------------------|-----------------|--------------------|-----------------|-----------------------|-----------------|
|                                 |                                          | p-value                                                   | r (effect size) | p-value            | r (effect size) | p-value               | r (effect size) |
| Benefit-Benefit Decision-Making | ArchT Rats versus Controls, Pre-Surgery  | 0.231                                                     | 0.271           | 0.113              | 0.372           | 0.178                 | 0.301           |
|                                 | ArchT Rats versus Controls, Post-Surgery | 0.493                                                     | 0.161           | 0.444              | 0.195           | 0.189                 | 0.294           |
|                                 | Pre- versus Post-surgery, Controls       | 0.07                                                      | 0.518           | 0.097              | 0.479           | 0.009                 | 0.693           |
|                                 | Pre- versus Post-surgery, ArchT Rats     | 0.011                                                     | 0.505           | 0.437              | 0.262           | 0.017                 | 0.698           |
| Cost-Cost Decision-Making       | ArchT Rats versus Controls, Pre-Surgery  | 0.243                                                     | 0.282           | 0.25               | 0.256           | 0.132                 | 0.333           |
|                                 | ArchT Rats versus Controls, Post-Surgery | 0.768                                                     | 0.069           | 0.668              | 0.111           | 0.065                 | 0.432           |
|                                 | Pre- versus Post-surgery, Controls       | 0.043                                                     | 0.569           | 0.019              | 0.637           | 0.047                 | 0.56            |
|                                 | Pre- versus Post-surgery, ArchT Rats     | 0.006                                                     | 0.768           | 0.91               | 0.039           | 0.04                  | 0.625           |
| Cost-Benefit Decision-Making    | ArchT Rats versus Controls, Pre-Surgery  | 0.463                                                     | 0.172           | 0.261              | 0.26            | 0.403                 | 0.2             |
|                                 | ArchT Rats versus Controls, Post-Surgery | 0.444                                                     | 0.178           | 0.601              | 0.153           | 0.509                 | 0.153           |

|                                          |                                      |          |       |          |       |          |       |
|------------------------------------------|--------------------------------------|----------|-------|----------|-------|----------|-------|
|                                          | Pre- versus Post-surgery, Controls   | 0.589    | 0.165 | 0.731    | 0.106 | 0.063    | 0.53  |
|                                          | Pre- versus Post-surgery, ArchT Rats | 0.667    | 0.147 | 0.356    | 0.308 | 0.076    | 0.556 |
| Bonferroni corrected significance level: |                                      | p=0.0028 |       | p=0.0083 |       | p=0.0083 |       |

1166 **Appendix 1 - Table 2.** Overview of p-values and effect sizes for post hoc t-tests comparing  
 1167 the choice behavior, percentage of omitted trials and reaction times on non-omitted trials  
 1168 between ArchT rats and their controls as well as within each group pre- and post-surgery.  
 1169 Bonferroni-corrected significance levels for each metric are indicated in the bottom row.

1170

### 1171 **Competing Interests**

1172 We declare no competing interests.

1173

### 1174 **Author Contributions**

1175 Conceptualization, B.S. and G.W.A.; Methodology, B.S., J.R.W. and G.W.A.; Software,  
 1176 B.S.; Formal Analysis, B.S.; Investigation, B.S. and S.H.D.; Writing – Original Draft, B.S.,  
 1177 S.H.D., J.R.W. and G.W.A.; Visualization, B.S.; Supervision, J.R.W. and G.W.A.

1178

### 1179 **References**

1180 Amemori KI, Amemori S, Gibson DJ, Graybiel AM. 2020. Striatal Beta Oscillation and  
 1181 Neuronal Activity in the Primate Caudate Nucleus Differentially Represent Valence and  
 1182 Arousal Under Approach-Avoidance Conflict. *Front Neurosci* **14**:1–17.  
 1183 doi:10.3389/fnins.2020.00089  
 1184 Amemori KI, Graybiel AM. 2012. Localized microstimulation of primate pregenual cingulate  
 1185 cortex induces negative decision-making. *Nat Neurosci* **15**:776–785.  
 1186 doi:10.1038/nn.3088

- 1187 Arbuthnott GW, MacLeod NK, Maxwell DJ, Wright AK. 1990. Distribution and synaptic  
1188 contacts of the cortical terminals arising from neurons in the rat ventromedial thalamic  
1189 nucleus. *Neuroscience* **38**:47–60. doi:10.1016/0306-4522(90)90373-C
- 1190 Augur IF, Wyckoff AR, Aston-Jones G, Kalivas PW, Peters J. 2016. Chemogenetic  
1191 activation of an extinction neural circuit reduces cue-induced reinstatement of cocaine  
1192 seeking. *J Neurosci* **36**:10174–10180. doi:10.1523/JNEUROSCI.0773-16.2016
- 1193 Aupperle RL, Paulus MP. 2010. Neural systems underlying approach and avoidance in  
1194 anxiety disorders. *Dialogues Clin Neurosci* **12**:517–31.
- 1195 Brazhnik E, McCoy AJ, Novikov N, Hatch CE, Walters JR. 2016. Ventral Medial Thalamic  
1196 Nucleus Promotes Synchronization of Increased High Beta Oscillatory Activity in the  
1197 Basal Ganglia-Thalamocortical Network of the Hemiparkinsonian Rat. *J Neurosci*  
1198 **36**:4196–4208. doi:10.1523/JNEUROSCI.3582-15.2016
- 1199 Brecht M, Sakmann B. 2002. Whisker maps of neuronal subclasses of the rat ventral  
1200 posterior medial thalamus, identified by whole-cell voltage recording and morphological  
1201 reconstruction. *J Physiol* **538**:495–515. doi:10.1113/jphysiol.2001.012334
- 1202 Catanese J, Jaeger D. 2021. Premotor ramping of thalamic neuronal activity is modulated by  
1203 nigral inputs and contributes to control the timing of action release. *J Neurosci* **41**:1878–  
1204 1891. doi:10.1523/JNEUROSCI.1204-20.2020
- 1205 Collins DP, Anastasiades PG, Marlin JJ, Carter AG. 2018. Reciprocal Circuits Linking the  
1206 Prefrontal Cortex with Dorsal and Ventral Thalamic Nuclei. *Neuron* **98**:366-379.e4.  
1207 doi:10.1016/j.neuron.2018.03.024
- 1208 Cruikshank SJ, Ahmed OJ, Stevens TR, Patrick SL, Gonzalez AN, Elmaleh M, Connors BW.  
1209 2012. Thalamic Control of Layer 1 Circuits in Prefrontal Cortex. *J Neurosci* **32**:17813–  
1210 17823. doi:10.1523/JNEUROSCI.3231-12.2012
- 1211 De La Peña E, Geijo-Barrientos E. 2000. Participation of low-threshold calcium spikes in



- 1212           excitatory synaptic transmission in guinea pig medial frontal cortex. *Eur J Neurosci*  
1213           **12**:1679–1686. doi:10.1046/j.1460-9568.2000.00061.x
- 1214 Deisseroth K. 2021. Predicted irradiance values: model based on direct measurements in  
1215           mammalian brain tissue. <https://web.stanford.edu/group/dlab/cgi-bin/graph/chart.php>
- 1216 Elena Erro M, Lanciego JL, Giménez-Amaya JM. 2002. Re-examination of the  
1217           thalamostriatal projections in the rat with retrograde tracers. *Neurosci Res* **42**:45–55.  
1218           doi:10.1016/S0168-0102(01)00302-9
- 1219 Floresco SB, Grace AA. 2003. Gating of hippocampal-evoked activity in prefrontal cortical  
1220           neurons by inputs from the mediodorsal thalamus and ventral tegmental area. *J Neurosci*  
1221           **23**:3930–43.
- 1222 Friedman A, Homma D, Bloem B, Gibb LG, Amemori K ichi, Hu D, Delcasso S, Truong TF,  
1223           Yang J, Hood AS, Mikofalvy KA, Beck DW, Nguyen N, Nelson ED, Toro Arana SE,  
1224           Vorder Bruegge RH, Goosens KA, Graybiel AM. 2017. Chronic Stress Alters  
1225           Striosome-Circuit Dynamics, Leading to Aberrant Decision-Making. *Cell* **171**:1191-  
1226           1205.e28. doi:10.1016/j.cell.2017.10.017
- 1227 Friedman A, Homma D, Gibb LG, Amemori KI, Rubin SJ, Hood AS, Riad MH, Graybiel  
1228           AM. 2015. A corticostriatal path targeting striosomes controls decision-making under  
1229           conflict. *Cell* **161**:1320–1333. doi:10.1016/j.cell.2015.04.049
- 1230 Gaidica M, Hurst A, Cyr C, Leventhal DK. 2018. Distinct Populations of Motor Thalamic  
1231           Neurons Encode Action Initiation, Action Selection, and Movement Vigor. *J Neurosci*  
1232           **38**:6563–6573. doi:10.1523/JNEUROSCI.0463-18.2018
- 1233 Guo Z V., Inagaki HK, Daie K, Druckmann S, Gerfen CR, Svoboda K. 2017. Maintenance of  
1234           persistent activity in a frontal thalamocortical loop. *Nature* **545**:181–186.  
1235           doi:10.1038/nature22324
- 1236 Herkenham M. 1979. The afferent and efferent connections of the ventromedial thalamic

- 1237 nucleus in the rat. *J Comp Neurol* **183**:487–517. doi:10.1002/cne.901830304
- 1238 Hosking JG, Cocker PJ, Winstanley CA. 2014. Dissociable contributions of anterior cingulate  
1239 cortex and basolateral amygdala on a rodent cost/benefit decision-making task of  
1240 cognitive effort. *Neuropsychopharmacology* **39**:1558–1567. doi:10.1038/npp.2014.27
- 1241 Ironside M, Amemori K ichi, McGrath CL, Pedersen ML, Kang MS, Amemori S, Frank MJ,  
1242 Graybiel AM, Pizzagalli DA. 2020. Approach-Avoidance Conflict in Major Depressive  
1243 Disorder: Congruent Neural Findings in Humans and Nonhuman Primates. *Biol*  
1244 *Psychiatry* **87**:399–408. doi:10.1016/j.biopsych.2019.08.022
- 1245 Jiang X, Wang G, Lee AJ, Stornetta RL, Zhu JJ. 2013. The organization of two new cortical  
1246 interneuronal circuits. *Nat Neurosci* **16**:210–218. doi:10.1038/nn.3305
- 1247 Johansson Y, Silberberg G. 2020. The Functional Organization of Cortical and Thalamic  
1248 Inputs onto Five Types of Striatal Neurons Is Determined by Source and Target Cell  
1249 Identities. *Cell Rep* **30**:1178-1194.e3. doi:10.1016/j.celrep.2019.12.095
- 1250 Klug JR, Engelhardt MD, Cadman CN, Li H, Smith JB, Ayala S, Williams EW, Hoffman H,  
1251 Jin X. 2018. Differential inputs to striatal cholinergic and parvalbumin interneurons  
1252 imply functional distinctions. *Elife* **7**:e35657. doi:10.7554/eLife.35657
- 1253 Kubota Y. 2014. Untangling GABAergic wiring in the cortical microcircuit. *Curr Opin*  
1254 *Neurobiol* **26**:7–14. doi:10.1016/j.conb.2013.10.003
- 1255 Kuramoto E, Furuta T, Nakamura KC, Unzai T, Hioki H, Kaneko T. 2009. Two types of  
1256 thalamocortical projections from the motor thalamic nuclei of the rat: A single neuron-  
1257 tracing study using viral vectors. *Cereb Cortex* **19**:2065–2077.  
1258 doi:10.1093/cercor/bhn231
- 1259 Lapper SR, Bolam JP. 1992. Input from the frontal cortex and the parafascicular nucleus to  
1260 cholinergic interneurons in the dorsal striatum of the rat. *Neuroscience* **51**:533–545.  
1261 doi:10.1016/0306-4522(92)90293-B

- 1262 Lee AJ, Wang G, Jiang X, Johnson SM, Hoang ET, Lanté F, Stornetta RL, Beenhakker MP,  
1263 Shen Y, Julius Zhu J. 2015. Canonical Organization of Layer 1 Neuron-Led Cortical  
1264 Inhibitory and Disinhibitory Interneuronal Circuits. *Cereb Cortex* **25**:2114–2126.  
1265 doi:10.1093/cercor/bhu020
- 1266 Loewke AC, Minerva AR, Nelson AB, Kreitzer AC, Gunaydin LA. 2021. Frontostriatal  
1267 Projections Regulate Innate Avoidance Behavior. *J Neurosci* **41**:5487–5501.  
1268 doi:10.1523/JNEUROSCI.2581-20.2021
- 1269 Mahn M, Prigge M, Ron S, Levy R, Yizhar O. 2016. Biophysical constraints of optogenetic  
1270 inhibition at presynaptic terminals. *Nat Neurosci* **19**:554–6. doi:10.1038/nn.4266
- 1271 Martin-Cortecero J, Nuñez A. 2016. Sensory responses in the medial prefrontal cortex of  
1272 anesthetized rats. Implications for sensory processing. *Neuroscience* **339**:109–123.  
1273 doi:10.1016/j.neuroscience.2016.09.045
- 1274 Matsuyama K, Tanaka M. 2021. Temporal prediction signals for periodic sensory events in  
1275 the primate central thalamus. *J Neurosci* **41**:1917–1927. doi:10.1523/jneurosci.2151-  
1276 20.2021
- 1277 Mobini S, Body S, Ho MY, Bradshaw C, Szabadi E, Deakin J, Anderson I. 2002. Effects of  
1278 lesions of the orbitofrontal cortex on sensitivity to delayed and probabilistic  
1279 reinforcement. *Psychopharmacology (Berl)* **160**:290–298. doi:10.1007/s00213-001-  
1280 0983-0
- 1281 Nakano Y, Karube F, Hirai Y, Kobayashi K, Hioki H, Okamoto S, Kameda H, Fujiyama F.  
1282 2018. Parvalbumin-producing striatal interneurons receive excitatory inputs onto  
1283 proximal dendrites from the motor thalamus in male mice. *J Neurosci Res* **96**:1186–  
1284 1207. doi:10.1002/jnr.24214
- 1285 Ozawa T, Ycu EA, Kumar A, Yeh LF, Ahmed T, Koivumaa J, Johansen JP. 2017. A  
1286 feedback neural circuit for calibrating aversive memory strength. *Nat Neurosci* **20**:90–

- 1287 97. doi:10.1038/nm.4439
- 1288 Paxinos G, Watson C. 2004. The Rat Brain in Stereotaxic Coordinates - The New Coronal  
1289 Set 5th Edition. Cambridge: Academic Press. doi:10.1016/0143-4179(83)90049-5
- 1290 Peirce JW. 2007. PsychoPy-Psychophysics software in Python. *J Neurosci Methods* **162**:8–  
1291 13. doi:10.1016/j.jneumeth.2006.11.017
- 1292 Pockberger H. 1991. Electrophysiological and morphological properties of rat motor cortex  
1293 neurons in vivo. *Brain Res* **539**:181–190. doi:10.1016/0006-8993(91)91619-C
- 1294 Saalman YB, Kastner S. 2011. Cognitive and Perceptual Functions of the Visual Thalamus.  
1295 *Neuron* **71**:209–223. doi:10.1016/j.neuron.2011.06.027
- 1296 Schwabe L, Wolf OT. 2009. Stress prompts habit behavior in humans. *J Neurosci* **29**:7191–8.  
1297 doi:10.1523/JNEUROSCI.0979-09.2009
- 1298 Sidibé M, Smith Y. 1999. Thalamic inputs to striatal interneurons in monkeys: Synaptic  
1299 organization and co-localization of calcium binding proteins. *Neuroscience* **89**:1189–  
1300 1208. doi:10.1016/S0306-4522(98)00367-4
- 1301 Sieveritz B, Arbuthnott GW. 2020. Prelimbic cortical targets of ventromedial thalamic  
1302 projections include inhibitory interneurons and corticostriatal pyramidal neurons in the  
1303 rat. *Brain Struct Funct* **225**:2057–2076. doi:10.1007/s00429-020-02109-3
- 1304 Smith Y, Raju D V., Pare JF, Sidibe M. 2004. The thalamostriatal system: A highly specific  
1305 network of the basal ganglia circuitry. *Trends Neurosci*. doi:10.1016/j.tins.2004.07.004
- 1306 Sousa N, Almeida OFX. 2012. Disconnection and reconnection: The morphological basis of  
1307 (mal)adaptation to stress. *Trends Neurosci* **35**:742–751. doi:10.1016/j.tins.2012.08.006
- 1308 Stafstrom CE, Schwindt PC, Chubb MC, Crill WE. 1985. Properties of persistent sodium  
1309 conductance and calcium conductance of layer V neurons from cat sensorimotor cortex  
1310 in vitro. *J Neurophysiol* **53**:153–170. doi:10.1152/jn.1985.53.1.153
- 1311 Stefanik MT, Kalivas PW. 2013. Optogenetic dissection of basolateral amygdala projections

- 1312 during cue-induced reinstatement of cocaine seeking. *Front Behav Neurosci* **7**:1–6.  
1313 doi:10.3389/fnbeh.2013.00213
- 1314 Stefanik MT, Kupchik YM, Brown RM, Kalivas PW. 2013a. Optogenetic evidence that  
1315 pallidal projections, not nigral projections, from the nucleus accumbens core are  
1316 necessary for reinstating cocaine seeking. *J Neurosci* **33**:13654–13662.  
1317 doi:10.1523/JNEUROSCI.1570-13.2013
- 1318 Stefanik MT, Kupchik YM, Kalivas PW. 2016. Optogenetic inhibition of cortical afferents in  
1319 the nucleus accumbens simultaneously prevents cue-induced transient synaptic  
1320 potentiation and cocaine-seeking behavior. *Brain Struct Funct* **221**:1681–1689.  
1321 doi:10.1007/s00429-015-0997-8
- 1322 Stefanik MT, Moussawi K, Kupchik YM, Smith KC, Miller RL, Huff ML, Deisseroth K,  
1323 Kalivas PW, Lalumiere RT. 2013b. Optogenetic inhibition of cocaine seeking in rats.  
1324 *Addict Biol* **18**:50–53. doi:10.1111/j.1369-1600.2012.00479.x
- 1325 Stujenske JM, Spellman T, Gordon JA. 2015. Modeling the Spatiotemporal Dynamics of  
1326 Light and Heat Propagation for InVivo Optogenetics. *Cell Rep* **12**:525–534.  
1327 doi:10.1016/j.celrep.2015.06.036
- 1328 Tepper JM, Koós T, Ibanez-Sandoval O, Tecuapetla F, Faust TW, Assous M. 2018.  
1329 Heterogeneity and diversity of striatal GABAergic interneurons: Update 2018. *Front*  
1330 *Neuroanat* **12**:1–14. doi:10.3389/fnana.2018.00091
- 1331 Walton ME, Bannerman DM, Alterescu K, Rushworth MFS. 2003. Functional specialization  
1332 within medial frontal cortex of the anterior cingulate for evaluating effort-related  
1333 decisions. *J Neurosci* **23**:6475–9. doi:23/16/6475 [pii]
- 1334 Williams LE, Holtmaat A. 2019. Higher-Order Thalamocortical Inputs Gate Synaptic Long-  
1335 Term Potentiation via Disinhibition. *Neuron* **101**:91-102.e4.  
1336 doi:10.1016/j.neuron.2018.10.049

- 1337 Wolff M, Morceau S, Folkard R, Martin-Cortecero J, Groh A. 2021. A thalamic bridge from  
1338 sensory perception to cognition. *Neurosci Biobehav Rev* **120**:222–235.  
1339 doi:10.1016/j.neubiorev.2020.11.013
- 1340 Yuan B, Morrow TJ, Casey KL. 1985. Responsiveness of ventrobasal thalamic neurons after  
1341 suppression of S1 cortex in the anesthetized rat. *J Neurosci* **5**:2971–2978.  
1342 doi:10.1523/jneurosci.05-11-02971.1985
- 1343
